1 **Path integration in large-scale space and with novel geometries: Comparing**  
2 **Vector Addition and Encoding-Error Models**

3

4 S. K. Harootonian<sup>1,2</sup>, R. C. Wilson<sup>2</sup>, L. Hejtmánek<sup>1,3</sup>, E. M. Ziskin<sup>1,2</sup>, A. D. Ekstrom<sup>1,2</sup>

5

6 <sup>1</sup>Center for Neuroscience, University of California Davis, Davis, CA

7 <sup>2</sup>Psychology Department, University of Arizona, Tucson, AZ

8 <sup>3</sup> Third Faculty of Medicine, Charles University, Ruská 87, Prague 10, 100 00, Czech Republic

9

10 \*Corresponding author

11 E-mail: [adekstrom@email.arizona.edu](mailto:adekstrom@email.arizona.edu)

12

13

14 \*Author contributions.

15 S.K.H. and A.D.E. conceived of the idea. S.K.H. and L.H. designed the experiment. S.K.H. and  
16 E.M.Z. acquired data. S.K.H. ran the analysis. S.K.H. and R.C.W. designed the model. S.K.H.,  
17 R.C.W. and A.D.E. wrote the manuscript.

18

19 Competing interests: The authors declare no competing interests.

20 \*Acknowledgements\_

21 The Authors are grateful to E. Erlenbach for helping during data collection. Research supported  
22 by grants from NSF Division of Behavioral and Cognitive Sciences [BCS-1630296] awarded to  
23 Arne Ekstrom.

24

25 **Abstract**

26 Path integration is thought to rely on vestibular and proprioceptive cues yet most studies  
27 in humans involve primarily visual input, providing limited insight into their  
28 contributions. We developed a paradigm involving walking in an  
29 omnidirectional treadmill in which participants were guided on two legs of a triangle and  
30 then found their back way to origin. In Experiment 1, we tested a range of different  
31 triangle types while keeping distance relatively constant to determine the influence of  
32 spatial geometry. Participants overshot the angle they needed to turn and undershot  
33 the distance they needed to walk, with no consistent effect of triangle type. In  
34 Experiment 2, we manipulated distance while keeping angle relatively constant to  
35 determine how path integration operated over both shorter and longer  
36 distances. Participants underestimated the distance they needed to walk to the origin,  
37 with error increasing as a function of the walked distance. To attempt to account for our  
38 findings, we developed computational models involving vector addition, the second of  
39 which included terms for the influence of past trials on the current one. We compared  
40 against a previously developed model of human path integration, the Encoding Error  
41 model. We found that the vector addition models captured the tendency of participants  
42 to under-encode guided legs of the triangles and an influence of past trials on current  
43 trials. Together, our findings expand our understanding of body-based contributions to  
44 human path integration, further suggesting the value of vector addition models in  
45 understanding these important components of human navigation.

46

47

## 48 **Author Summary**

49 How do we remember where we have been? One important mechanism for doing so is  
50 called path integration, which refers to the ability to track one's position in space with  
51 only self-motion cues. By tracking the direction and distance we have walked, we can  
52 create a mental arrow from the current location to the origin, termed the homing vector.  
53 Previous studies have shown that the homing vector is subject to systematic distortions  
54 depending on previously experienced paths, yet what influences these patterns of  
55 errors, particularly in humans, remains uncertain. In this study, we compare two models  
56 of path integration based on participants walking two legs of a triangle without vision  
57 and then completing the third leg based on their estimate of the homing vector. We  
58 found no effect of triangle shape on systematic errors, while path length scaled the  
59 systematic errors logarithmically, similar to Weber-Fechner law. While we show that  
60 both models captured participant's behavior, a model based on vector addition best  
61 captured the patterns of error in the homing vector. Our study therefore has important  
62 implications for how humans track their location, suggesting that vector-based models  
63 provide a reasonable and simple explanation for how we do so.

## 64 **Intro**

65 “Dead reckoning,” first coined by Charles Darwin (Darwin, 1856/1987), described  
66 a process whereby experienced navigators kept course to a particular spot over long  
67 distances and changes in directions, despite being in the featureless arctic tundra. All  
68 animal species tested show the ability to dead reckon (referred to here as path  
69 integration), including spiders (Görner, 1958), bees (Lindauer, 1963), gerbils (Mittelstaedt  
70 & Mittelstaedt, 1980), hamsters (Etienne, 1987), house mice (Alyan & Jander, 1994), rats  
71 (Tolman, 1948), birds (Mittelstaedt & Mittelstaedt, 1982), ants (Wehner & Srinivasan,  
72 1981), arthropods (Mittelstaedt, 1983), drosophila (Green et al., 2017), dogs (Seguinot,  
73 Cattet, & Benhamou, 1998), cats, and humans (Beritashvili, 1965). Please see Redish  
74 (1999), Gallistel (1990), and Klatzky, Loomis, and Golledge (1997) for a review of prior  
75 literature. Because humans employ vision as a primary modality to navigate, however,  
76 research on path integration has often been neglected in favor of situations in which visual  
77 input provides sufficient information to solve most navigational tasks, such as in desktop  
78 virtual reality. A limitation, however, with this testing modality is that it lacks the enriched  
79 cues and codes that we obtain when we freely move our body throughout space, thought  
80 to be critically important to path integration (Chance, Gaunet, Beall, & Loomis, 1998;  
81 Starrett & Ekstrom, 2018; Taube, Valerio, & Yoder, 2013).

82 Past experiments have often involved a path completion task in which the  
83 navigator is guided in physical space and must return using the shortest path back to the  
84 origin (Loomis et al., 1993; Görner, 1958; Müller & Wehner, 1988). Such work suggests  
85 that the navigator stores a representation of their current position relative to the origin that  
86 is periodically updated, frequently referred to as the homing vector. This in turn led to the

87 suggestion that path integration involves vectorized representations of paths that are  
88 manipulated using vector addition, translation, rotation, and other well-established  
89 properties of matrix algebra. Computational modeling studies on path integration in both  
90 vertebrates and invertebrates support the idea of such vector-like representations, further  
91 suggesting that the homing vector is biased by systematic errors which are independent  
92 of random accumulated noise (Cartwright & Collett, 1987; Etienne et al., 1998; Etienne,  
93 Maurer, & Séguinot, 1996; Kubie & Fenton, 2009; Wittmann & Schwegler, 1995). Exactly  
94 how these pattern of systematic errors accumulate, however, is not clear, particularly in  
95 humans.

96 In humans, a frequently employed task is the triangle completion task in which the  
97 experimenter guides the participant on two legs of a triangle and then must return, without  
98 guidance, to the origin (Klatzky, 1990; Loomis, 1993). To model how systematic errors  
99 accumulate when human participants perform path completion tasks and the triangle  
100 completion task more specifically, Fujita et al. 1993 proposed the Encoding Error Model.  
101 This model proposes that the systematic errors in path completion tasks such as triangle  
102 completion task only occur during encoding stage. The model has four assumptions: (1)  
103 the internal representation satisfies Euclidean axioms (2) straight-line segments are  
104 encoded as a single value that represent their length (3) turns are encoded as a single  
105 value that represents the angle (4) there are no systematic errors during computation or  
106 execution of the homeward trajectory.

107 In support of their model, Fujita et al. fit data collected in Klatzky et al. 1990 and  
108 Loomis et al. 1993 involving the triangle completion task in the absence of vision. The

109 model captured the systematic errors seen in both studies to a relatively high degree (see  
110 Fujita et al. 1993 Table 3). As predicted, though, the model performed poorly for paths  
111 with more than two sides or paths that crossed each other included in Klatzky et al. 1990.  
112 The Encoding Error model was expanded in Klatzky et al. 1999 to test its generalizability,  
113 who found that systematic errors were context and experience dependent. They also  
114 found that while partial vision increased path accuracy, it did not change the pattern of  
115 errors.

116 Another important finding, supported by the Encoding-Error Model and other  
117 studies (Petzschner & Glasauer, 2011), was that systematic errors in path integration, at  
118 least in small sized environments ( $\leq 10\text{m}$ ), showed a pattern of regression to the mean.  
119 Specifically, past paths influenced the current paths and therefore, shorter angles and  
120 distances were overestimated and longer angles and distances were underestimated  
121 (Klatzky et al., 1990; Loomis et al., 1993). Petzschner and Glasauer 2011 (using desktop  
122 virtual reality) extended these findings by showing that the same angle or distance value  
123 could be overestimated in some cases and underestimated in others. The degree of  
124 under/overestimation depended on the distribution of priors, known as range effects, such  
125 that a broader distribution of priors (e.g., distances from 5-100 meters vs. 5-10 meters)  
126 increased the effect of the regression to the mean (Teghtsoonian & Teghtsoonian, 1978).

127 The issue of how the distribution of priors influences the current trajectories,  
128 however, begs the question of how path configurations affect errors in the triangle  
129 completion task. Specifically, past work suggests that the geometric properties of shapes  
130 can influence navigation (Cheng, 1986; Landau, Gleitman, & Spelke, 1981). For  
131 example, shapes like isosceles or equilateral triangles could serve as “templates” for how

132 we learn paths (Seguinot et al., 1998) by providing a means for estimating paths that  
133 approximate it. Grid cells, neurons that fire as animals explore spatial environments,  
134 show 6-fold symmetry, with equilateral triangles composing part of this structure (Hafting,  
135 Fyhn, Molden, Moser, & Moser, 2005). Given arguments that neural codes might  
136 manifest in spatial representations useful for navigating (Bellmund, Gärdenfors, Moser, &  
137 Doeller, 2018; Milivojevic & Doeller, 2013) and the proposed link between path integration  
138 and grid cells (Chen, He, Kelly, Fiete, & McNamara, 2015; Moser & Moser, 2008), it could  
139 be the case that geometric regularities (equilateral triangles) also influence path  
140 integration. Indeed, some past studies on the triangle completion task provide support  
141 for the idea that geometric regularities can, in some cases, influence path accuracy  
142 (Klatzky et al., 1990). Yet, whether and how different types of triangles (equilateral vs.  
143 isosceles vs. scalene) influence path accuracy and patterns of errors on the unguided leg  
144 in the triangle completion task remains unclear.

145 Another important yet largely unanswered question about human path integration  
146 regards the accuracy and patterns of errors over longer distances. The vast majority of  
147 studies in human path integration have involved small-scale environments ( $\leq 10$  meters)  
148 and consistent with this, computational models of path integration largely base their  
149 predictions on such smaller scales. For example, Klatzky et al., 1999 suggested that it is  
150 unlikely that same encoding function in their model is used for pathways that are larger than  
151 10 meters<sup>1</sup>. A more recent computational model of path integration that employs grid

---

<sup>1</sup> Klatzky et al. 1999 state: “The assumption of immutable encoding seems, a priori, to be doubtful. Encoding of pathways on the scale of tens of meters is unlikely to use the same mapping as is used for pathways on the scale of under 10 m (p. 35)

152 cells suggests that, in the absence of specific mnemonic aids, path integration codes may  
153 rapidly degrade in mammals (Cheung, Ball, Milford, Wueth, & Wiles, 2012), consistent  
154 with the idea that path integration could breakdown dramatically over longer distances.  
155 Interestingly, however, other grid cell models assuming leaky integration rather than  
156 single value encoding suggest reliable estimations to up to 100 meters (Burak et al. 2009).  
157 Thus, an important question to test is how well human participants perform at path  
158 integration over longer distances ( $\geq 100$  meters) and whether the Encoding-Error model  
159 vs. vector addition models most accurately captures such phenomenon in larger scales  
160 of space.

161         In the current study, we employed an omnidirectional treadmill and somatosensory  
162 input via handheld controllers (Figure 1A) to determine the extent to which manipulating  
163 the angle and distance participants needed to walk affected the accuracy of navigation  
164 without vision. The unique advantage of using the omnidirectional treadmill is it permits  
165 manipulation of infinity large spaces thereby eliminating the need for any boundaries while  
166 preserving the input from walking. The issue of boundaries, perceived or imagined, is a  
167 potential issue because if a participant were to over shoot a distance they would be  
168 stopped before hitting a wall, providing inadvertent feedback on the distances of the room  
169 and potentially affecting subsequent performance. In addition, the use of handheld  
170 controllers allowed us to carefully manipulate participant trajectories on the guided legs,  
171 an issue we return to in greater depth in the discussion.

172         Here, we set out to test a simple yet novel model of path integration based on  
173 vector addition (often used to model path integration in other species) to better capture  
174 the pattern of errors in the triangle completion task in human participants (Etienne et al.,



175 1998; Cartwright & Collett, 1987). Experiment 1 explicitly manipulated triangle type (while  
176 keeping homing distance constant) to test the extent to which different shapes of triangles  
177 (isosceles, equilateral) influenced how participants learned the homing vector. In  
178 Experiment 2, we explicitly manipulated the distance participants had to walk to reach the  
179 origin (while keeping triangle type constant) to determine how participants performed over  
180 a range of different distances. Critically, by manipulating these variables, we were able  
181 to simultaneously test hypotheses related to 1) triangle type and whether some might  
182 perform better than others; 2) homing distance and whether path integration would show  
183 different properties at ~10m vs. ~100m; 3) which model, one based on vector addition or  
184 the Encoding-Error model, would provide a better account of the pattern of findings. We  
185 provide a detailed comparison of the assumptions and set-up of the different models in  
186 the Methods section.

187

188

## 189 **Results**

### 190 **Experiment 1: Basic behavior**

191 An example raw trace of a participant's path overlaid on the vector distances is  
192 shown in Figure 1D (dashed lines) between the points. We defined angle error as  $\beta - \phi$ ,  
193 where a positive number denotes an overshoot and negative an undershoot. Distance  
194 error is the ratio of leg D (unguided walked distance) over the distance of C (homing  
195 vector from G2); a value greater than 1 is an overshoot and less than 1 an undershoot.  
196 As can be seen in the raw example shown (Figure 1G & H) and others (Supplementary  
197 Figure 1), although participants were often quite accurate at completing the triangle, they

198 tended to overestimate the angle and underestimate the distance, regardless of triangle  
199 type. We will compare our finding of systematic errors with prior literature, specifically,  
200 with Klatzky et al., 1999, in the Discussion section.

201

### 202 *Participants overestimate angle and underestimate distance*

203 We next addressed the extent to which this overestimation of angle and underestimation  
204 of distance was true across the group of participants. As shown in Figure 2A, we found  
205 a tendency for participants to overestimate the angle they needed to turn to reach their  
206 start point ( $t(21)=3.7, p<0.001$ , Cohen's  $d=0.79, BF_{10}>10$ ), with participants, on average,  
207 tending to turn about  $34.71^{\circ}\pm 9.37^{\circ}$  too far when estimating the angle they would need to  
208 turn to reach the origin. In contrast, we found that participants tended to underestimate  
209 the distance they needed to walk to get back to the start point, with participants  
210 normalized walked distance significantly less than 1 (see Figure 2B,  $t(21)=16, p<0.001$ ,  
211 Cohen's  $d=3.42, BF_{10}>10$ ). Nonetheless, the average normalized walked distance was  
212  $0.87\pm 0.05$  ( $8.70\text{m}\pm 0.50\text{m}$ ), which was, on average, close to the correct response of 1  
213 (10m). To determine the overall accuracy of the walked distance, we regressed the  
214 homing vector (leg C) onto participants' unguided walked vector (leg D) using a vector  
215 model described in the methods. The beta values were positive and well above zero  
216 ( $t(21)=5.4, p<.001$ , Cohen's  $d= 1.151, BF_{10}>10$ ), demonstrating that participants, despite  
217 underestimating distance, were well above chance in their estimates.

218

### 219 *Results not dependent on the sensory modality of guidance information*

220 To ensure that our results were not due to difficulty with employing the handheld  
221 controllers to navigate the guided legs, we compared against a subset of trials in  
222 Experiment 1 in which the guided legs involved a visual beacon (note that participants  
223 otherwise navigated the unguided legs identically in somatosensory and vision  
224 conditions). During the *guided* section of the trials, there was no effect of vision  
225 (Supplementary Figure 2A  $t(21)=1.09$ ,  $p=0.288$ , Cohen's  $d=0.336$  and  $BF_{01}>3$ ),  
226 confirming that the hand-held controller feedback system provides sufficient guidance.  
227 For angle error on the unguided leg, as shown in Supplementary Figure 2B&D, we found  
228 a slight but significant improvement in the vision-on (SD:43.10°) compared to vision-off  
229 (SD:46.51°) condition ( $F(1, 21)=4.9$ ,  $p<0.026$ ,  $\eta^2=0.016$   $BF_{10}=1.16$ ). For distance error,  
230 as shown in Supplementary Figure 2C&E, we also found a decrease in distance error  
231 during vision-on (SD:0.256) trials compared to vision-off (SD:0.271) ( $F(1, 21)=8.2$ ,  
232  $p<0.004$ ,  $\eta^2=0.026$   $BF_{10}=4$ ). These findings suggest that providing vision on the guided  
233 legs did improve angle and distance estimates on the unguided leg, but that participants  
234 still tended to overestimate angle and underestimate distance (see Supplementary Figure  
235 2D&H for additional information). Klatzky et al. 1999 also found partial vision to improve  
236 accuracy, though it seemed to have little effect the direction of systematic errors. Thus,  
237 the overestimation of angle and underestimation of distance that we observed cannot be  
238 accounted for by difficulty in completing the unguided legs using somatosensory input  
239 alone.

240

241 *Little to no consistent effect of triangle shape on patterns of error in path integration*

242 Next, we wished to address the issue of triangle shape and whether this may have  
243 contributed in any way to the patterns of errors for the unguided leg, as this might suggest  
244 participants used geometric features to anchor their path integration knowledge. For  
245 example, it could be that participants were most accurate for distance and angle on one  
246 triangle type (for example, right or equilateral triangles). To address this issue, we  
247 compared error on the unguided leg with triangle type as an independent factor. Overall,  
248 we found only a modest effect of triangle type on angle error ( $F(6,21)=2.9$ ,  $p<0.01$ ,  $\eta^2$   
249  $=0.058$ ,  $BF_{10}=1.72$ ). Distance error, however, showed a fairly robust difference as a  
250 function of triangle type ( $F(6, 21)=5.7$ ,  $p<0.1.33e-5$ ,  $\eta^2=0.109$   $BF_{10}>10$ ); see Figure 2A  
251 and 2B. Importantly, however, we did not find a consistent effect of triangle type across  
252 angle *and* distance errors, which might be expected if triangle *shape* had an influence on  
253 trajectories. For example, the isosceles triangle (30,120,30) showed the lowest mean  
254 angle error ( $10.96^\circ \pm 9.11^\circ$ ) yet the equilateral triangle demonstrated the lowest mean  
255 distance error ( $0.985 \pm 0.062$ ). Thus, the inconsistent effects across triangle types and the  
256 small effects sizes we obtained for angle error suggest that participants were unlikely to  
257 be relying on geometric cues from the triangle shapes, which would involve remembering  
258 both the angle and distance for a specific triangle type. Instead, we attribute the lower  
259 angle and distance errors for isosceles and equilateral triangles, respectively, to the  
260 effects of repeating the same distances two times, an issue we return to in the Discussion.

261 As an additional analysis to investigate the use of geometric features of triangles,  
262 if participants were using specific shapes over others to perform the task, we might expect  
263 that both angle and distance errors would be correlated, consistent with using the shape,  
264 rather than individual features, to compute the unguided leg. Comparing angle and

265 distance error is also important to determining the extent to which these two estimates  
266 were stored in a common vs. independent manner. We found no correlation between  
267 angle and distance error across trials and participants  $r(579)=0.0035$ ,  $p=0.933$  (Figure  
268 2C), suggesting that angle and distance errors were not related to each other. We also  
269 observed no clustering of angle and distance error by triangle type (Figure 2C). Finally,  
270 we looked at the left and right handedness of the triangle and found no difference between  
271 them (Supplementary Figure 3A & B; angle error  $t(21)=0.7$ ,  $p=0.485$ , Cohen's  $d=0.118$ ,  
272  $BF_{01}>3$  and distance error  $t(21)=1.136$ ,  $p=0.268$ , Cohen's  $d=0.103$  and  $BF_{01}=2.53$ ).  
273 Together, these findings suggest that triangle shape and the direction which participants  
274 navigated the triangle (i.e., right or left), contributed minimally, if at all, to performance on  
275 the unguided leg.

276

277 *Computational modeling suggests that participants under and unevenly weigh the guided*  
278 *legs in Experiment 1*

279 To better understand the pattern of errors that participants made in Experiment 1, we built  
280 a computational model to predict the pattern of errors for the unguided legs. We  
281 combined angle and distance into a single vector value (see Methods) and employed the  
282 vectors for guided leg A and B as predictors for the unguided leg. Based on previous  
283 findings (Fujita et al., 1993), we would expect the guided legs to strongly predict  
284 performance on the unguided leg. The modeling approach we employed also allowed us  
285 to compare the relative weighting of leg A vs. leg B and whether past trial history had any  
286 impact on unguided leg performance.

287           The modeling analysis revealed that both guided legs A and B strongly predicted  
288 performance on the unguided leg (mean  $\beta_A = 0.3$ ,  $t(21)=2.86$   $p<0.0001$   $BF_{10}>3$  and mean  
289  $\beta_B = 0.813$ ,  $t(21)=7.41$   $p<0.0001$ ,  $BF_{10}>10$ ; Figure 3A). Notably, only A's beta value was  
290 significantly less than 1 ( $t(21)=6.6$ ,  $p<1.299e-6$ ,  $BF_{10}>10$  ), suggesting that participants  
291 underweighted leg A when estimating the return vector, potentially, accounting for the  
292 angle overestimation. In addition, leg B was weighted higher than leg A, ( $t(21)=3.62$ ,  
293  $p<0.002$ , Cohen's  $d=1.02$ ,  $BF_{10}>10$ ).

294           For model 2 (equation 5), which included participants' past trial history, we found  
295 mean  $\beta_A = 0.316$ ,  $t(21)=2.52$ ,  $p<0.02$ ,  $BF_{10}=2.75$  and mean  $\beta_B = 0.659$ ,  $t(21)=5.51$ ,  
296  $p<0.0001$ ,  $BF_{10}>10$ , suggesting similar results in terms of underweighting the guided legs  
297 as Model 1. However, we found no significant effect of past trials (mean  $\beta_\chi = 0.062$ ,  
298  $t(21)=1.03$ ,  $p<0.31$ ,  $BF_{01}=2.89$ ), suggesting that sequential effects were minimal in  
299 Experiment 1 (Figure 3A). Because the priors were relatively stable in Experiment 1 (i.e.,  
300 distance was not explicitly manipulated), this result is consistent with the idea that the  
301 range of distances tested in Experiment 1 was insufficient to see a regression of to the  
302 mean effect (Teghtsoonian & Teghtsoonian, 1978).

303           Taken together, these findings suggest that the patterns from Experiment 1, which  
304 involved different triangle types, could be captured by our vector-based models,  
305 particularly Model 1. Participants underweighted both guided legs A and B, with a  
306 tendency to underweight leg A to a greater extent. We found no evidence for distances  
307 and angles on past trials providing any explanatory power for the unguided leg.

308

309 *Model validation*

310 Next, we simulated Model 1 to determine whether it could account for the trends observed  
311 in the empirical data (Palminteri, Wyart, & Koechlin, 2017; Wilson & Collins, 2019). We  
312 found that Model 1 captured both the angle overestimation (Figure 4A) and distance  
313 underestimation (Figure 4B) in Experiment 1. The simulation results also supported the  
314 idea that Model 1 provided a better account for the data than Model 2 (Figure 5A-C) and  
315 captured the relevant empirical phenomenon reported here.

316

### 317 *Encoding-Error Model*

318 We fitted and simulated our data using the Encoding-Error Model, and, similar to Model  
319 1 and Model 2, were able to capture the systematic errors in angle overestimation (Figure  
320 6a) and distance underestimation (Figure 6b). Similarly, the Encoding-Error Model, given  
321 the limited range of triangle distances in Experiment 1, did not show regression to the  
322 mean. When we directly compared the models (Supplementary Figure 6 A-C), however,  
323 we found that Model 1 fit the data fairly decisively, at both subject and group level. While  
324 Model 1 did outperform the other two models in BIC and AIC, the confusion matrix in  
325 Supplementary figure 7 A-C showed that simulated data from Encoding-Error model did  
326 not fit Encoding-Error model best compared to the two vector addition models. This  
327 method of model recovery suggests some limitations with our model comparison (i.e.  
328 how well our task can distinguish between models) and was likely due to small number  
329 of trials and the fact that the vector addition models involved far fewer free parameters  
330 than the Encoding-Error Model (Wilson & Collins 2019). We return to a more detailed  
331 comparison between vector addition and Encoding-Error Models in the Discussion.

332

## 333 **Experiment 2**

### 334 *Basic behavior*

335 In Experiment 2, we manipulated the distance of the triangles (perimeters = 15.19,  
336 25.32, 126.60, 253.20, and 506.42 meters) while keeping triangle geometry relatively  
337 constant. This involved necessarily manipulating the distance of the guided legs, yet we  
338 overall maintained a scalene triangle shape, thus leaving angle as comparatively constant  
339 as possible. We implemented the same task structure as Experiment 1 but here we kept  
340 the shape of the guided path the same and varied the scale across trials.

341

### 342 *Participants systematically underestimated distance but accurately estimated angle*

343 For angle error, somewhat in contrast to Experiment 1, we found no significant  
344 overestimation or underestimation of angle, with participant's showing a mean error of  
345  $0.8^{\circ} \pm 7.44^{\circ}$  ( $t(16)=0.107$ ,  $p=0.916$ , Cohen's  $d=0.026$ ,  $BF_{01}>3$ ). We also found no effect of  
346 triangle size on angle error (Figure 2D ( $F(4,16)=0.609$ ,  $p=0.658$ ,  $\eta^2 =0.036$ ,  $BF_{01}>10$ ). We  
347 attribute this to the fact that triangle configuration was consistent across Experiment 2, as  
348 we primarily manipulated distance.

349 We found evidence of fairly accurate estimation of distance for smaller triangle  
350 perimeters (15-25m perimeter) and considerable underestimation for larger triangle  
351 perimeters (126m – 500m perimeter). In fact, we found a trend whereby distance  
352 underestimation increased as a function of the unguided distance (Figure 2E,  
353  $F(4,16)=21.107$ ,  $p<3.913e-11$ ,  $\eta^2 =0.553$  and  $BF_{10}>10$ ). This is shown in Figure 7A,  
354 where the dotted line indicates a slope of 1, with the actual slope well below this value. In



355 other words, the further that participants walked, the more they tended to underestimate  
356 the unguided leg.

357 To better understand this phenomenon, we analyzed the spread of the errors as  
358 participants walked the unguided leg. We found that distribution of distance error scaled  
359 linearly as a function of the walked distance. As shown in Figure 7B, the standard  
360 deviation of the walked unguided distances increased linearly, as shown by a regression  
361 fit ( $F(1,3)=557.4$ ,  $\beta_1=4.417$ ,  $r^2=0.9929$ ), suggesting that the greater the walked distance,  
362 the proportionately greater the error in distance with variance increasing exponentially.  
363 Note that this phenomenon is distinct from that related to systematic error. Systematic  
364 errors for distance error increased as well, however, this increase was best fit by a  
365 logarithmic function (Figure 7C,  $t(4)=11.65$ ,  $p<0.00136$ ) rather than linearly, similar to  
366 Weber–Fechner and Stevens' power law (Stevens,1975). Together, these findings  
367 suggest that as participants walked longer distances, they tended to increase their  
368 underestimation of the distance they would need to walk and scale their errors  
369 logarithmically as a function of distance.

370 Similar to Experiment 1, we also found no correlation between angle and distance  
371 error (Figure 2C,  $t(487)=0.623$ ,  $p=0.533$ ,  $BF_{01}>7.8$ ). We also found no effect of right vs.  
372 left turns on guided legs (angle error:  $t(16)=1.51$ ,  $p=0.151$ , Cohen's  $d=0.245$ ,  $BF_{01}=1.55$   
373 and distance error: ( $t(16)=0.724$ ,  $p=0.4797$ , Cohen's  $d=0.176$  and  $BF_{01}=3.188$ ), see  
374 supplementary Figure 3C & D.

375

376 *Computational modeling suggests sequential effects of past trials in Experiment 2*

377 To better understand the effects of the guided legs on the unguided leg estimates in  
378 Experiment 2, we employed the computational model used in Experiment 1 to predict the  
379 pattern of errors for the unguided legs. The modeling analysis again revealed that both  
380 guided legs A and B strongly predicted performance on the unguided leg (mean  $\beta_A=0.$   
381 494,  $t(16)=5.09$ ,  $p<0.0001$ ,  $BF_{10}>10$  and mean  $\beta_B=0.579$ ,  $t(16)=9.29$ ,  $p<0.0001$ ,  
382  $BF_{10}>10$ ) (Figure 3B). Notably, both beta values were less than 1 ( $\beta_A$   $t(16)=5.22$   $p<2.24e-$   
383 5,  $BF_{10}>10$  and  $\beta_b$   $t(16)=7.07$   $p<0.0094$ ,  $BF_{10}>10$ ), suggesting that participants  
384 underweighted *both* legs when estimating the return vector. In addition, unlike  
385 Experiment 1, both legs were weighted evenly ( $t(16)=0.63$ ,  $p=0.467$ , Cohen's  $d=0.25$ ,  
386  $BF_{01}>3$ ). These findings are perhaps unsurprising because angle was neither under nor  
387 overestimated.

388 Comparing model 1 (modeling the distance of the guided legs to predict the  
389 unguided legs) and 2 (using model 1 with an additional term for past trial distances), we  
390 found significant fits for all three beta terms. In other words, guided legs A & B, as well  
391 as past trial history (mean  $\beta_A = 0.466$ ,  $t(16)=4.42$ ,  $p<0.001$ ,  $BF_{10}>10$ , mean  $\beta_B = 0.568$ ,  
392  $t(16)=9.29$ ,  $p<0.001$ ,  $BF_{10}>10$  and mean  $\beta_\chi = 0.020$ ,  $t(16)=3.82$ ,  $p<0.001$ ,  $BF_{10}>10$ ), all  
393 predicted errors in walking the unguided leg in Experiment 2. Thus, in contrast to  
394 Experiment 1, trial history provided a significant explanation of error in Experiment 2.

395

### 396 *Model validation*

397

398 Next, we simulated our data in a manner similar to Experiment 1. Simulated data from  
399 Model 1 showed that we were able to capture participant patterns in angle error (Figure

400 4D). While Model 1 captured the distance underestimation (Figure 4E), it did not capture  
401 the trend of increase in underestimation as a function of distance. We hypothesized that  
402 this effect could be an influence of past trials, in other words, a form of regression to the  
403 mean (Klatzky, Beall, Loomis, Golledge, & Philbeck, 1999; Petzschner & Glasauer, 2011).  
404 Figure 5D shows the simulated angle error from Model 2, and we are again able to capture  
405 the accurate angle predictions. Importantly, however, simulated distance error, as shown  
406 in Figure 5E, better captured the pattern of distance underestimation. Model 2, in  
407 particular, captured the tendency of participant underestimation of distance to increase  
408 as a function of distance while Model 1 (which did not include trial history) was not able  
409 to capture this effect. These findings suggest that the increasing underestimation of  
410 distance was influenced, in part, by past trials.

411

#### 412 *Encoding-Error Model*

413 The Encoding-Error Model also captured some of the same patterns in the data as Model  
414 1 and 2. The simulated data from the Encoding-Error Model showed accurate angle error  
415 and underestimation of distance errors as a function of distance (Figure 6 D&E). We also  
416 considered how well the Encoding-Error Model compared with Model 2 in terms of  
417 capturing the mean systematic error in distance, which was 1- mean distance error  
418 (Figure 7 C-E). While the Encoding-Error Model fit the logarithmic function of systematic  
419 errors, the values were less accurate than Model 2. Similar to Experiment 1, Model 2 best  
420 fit the data but the BIC and AIC favored Model 1 (Supplementary figure 6 D-F). Notably,  
421 though, our analyses (see Figure 4 D-F) suggested that Model 1 did not capture the  
422 pattern of systematic errors and thus we removed it from the model comparison with the

423 Encoding-Error Model. As shown in Supplementary Figure 8 A-D, we can see Model 2  
424 fits 11 subject's data better while Encoding-Error Model fit the other 5 subject data better.  
425 Similar to Experiment 1, the confusion matrix (Supplementary Figure 9 A-C) showed that  
426 Encoding-Error model did not fit its own simulated data well. This was likely due to small  
427 number of trials and the fact that the vector addition models involved fewer free  
428 parameters than the Encoding-Error Model (Appendix A). We return to a more detailed  
429 comparison of the models in the Discussion.  
430

## 431 **Discussion**

432           In two different experiments, participants were guided on two legs of a triangle and  
433 then attempted to return to the origin without any input using a novel interface involving  
434 an omnidirectional treadmill. In Experiment 1, we manipulated triangle type (equilateral  
435 vs. isosceles vs. right vs. scalene) while holding distance on the unguided leg constant to  
436 minimize prior effects. Consistent with previous work using the triangle completion task  
437 in small-scale room sized environments (Fujita et al., 1993; Klatzky et al., 1997; Loomis  
438 et al., 1993; Philbeck et al., 2001; Yamamoto et al., 2014), we found that participants  
439 underestimated distance and overestimated angle, however these systematic errors did  
440 not show a regression to the mean effect. In Experiment 1, our computational modeling  
441 results suggested that this pattern could be explained by a model in which participants  
442 underweighted leg A compared to leg B. In Experiment 2, we found systematic errors in  
443 distance as participants accurately estimated the angle they needed to turn while  
444 increasingly underestimating the unguided leg as a function of distance, consistent with  
445 logarithmic scaling described in the Weber-Fechner law. Modeling results for Experiment  
446 2 further suggested equal weighting of both encoded legs. We also found no correlation  
447 between angle and distance errors in both experiments, consistent with reports that, at  
448 least in part, we derive angular motion from the semicircular canals and linear motion  
449 through the otoliths (Carriot et al., 2015). Our findings thus suggest that participants used  
450 independent estimates of direction and magnitude to estimate a homing vector, with the  
451 current trial guided legs influencing estimates of the homing vector.

452           In Experiment 1, we found that triangle type had little influence on participants'  
453 performance on the unguided leg. For example, it might be possible to predict that  
454 equilateral triangles or right triangles would be overall more accurate than scalene

455 triangles. This is because these geometries are far more regular and potentially easier  
456 to encode holistically, particularly given their influence on visually guided navigation (Moar  
457 & Bower, 1983). While we did find that the equilateral triangle showed significantly lower  
458 distance error, we attribute this to a working memory effect based on the equivalence of  
459 all three leg distances. Similarly, we found a weak tendency for the isosceles triangle  
460 angles (30,120,30) to show lower angle overestimation. One might expect, though, that if  
461 participants, or a subset of them, used a template (i.e., fit the guided legs to an equilateral  
462 or right triangle and estimated the return vector from there), we would also find that they  
463 would also be more accurate on that particular triangle. While we did not find this over  
464 our group of participants, we did find two participants who showed a high degree of  
465 accuracy on equilateral and right isosceles triangles (Supplementary Figure 4C). Thus,  
466 while it is possible a small subset of a participants employed triangle “templates,” our  
467 findings suggest that the majority of participants did not. Overall, the lack of any  
468 consistent effects in angle and/or distance for specific triangle types in terms of accuracy  
469 and the lack of a correlation between angle and distance representations suggests that  
470 the geometric properties of specific triangles played little, if any, role in solving the triangle  
471 completion task. Instead, these findings thus suggest that path integration mechanisms  
472 in humans are based on continuous encoding of heading direction and magnitude during  
473 the guided legs, after which vector addition is used to construct a homing vector.

474 In Experiment 2, we tested homing behavior over distances much longer than  
475 those typically employed in past human studies. Almost all of our current knowledge base  
476 about path integration mechanisms in humans derive from testing in room-sized  
477 environments, and therefore, in contrast to what is known about other species, the extent

478 to which path integration mechanisms operate accurately over distances greater than 10  
479 meters remains unclear. We found that participants were fairly accurate in their ability to  
480 complete the third leg of a triangle, even for triangle perimeters as long as 500 meters.  
481 Although we found a systematic increase in error and underestimation as a function of  
482 longer distances, these biases increased logarithmically, suggesting that the basic  
483 mechanisms underlying path integration were not substantially different at 500 meters  
484 compared to 25 meters. In contrast to Experiment 1, we found that both legs A and B  
485 contributed equally to errors in unguided leg C, although we attribute this effect to the fact  
486 that we did not manipulate angle in Experiment 2. We did find, however, that past trial  
487 history contributed significantly to the pattern of errors at longer distances. These findings  
488 suggest that in fact some of the properties of path integration do change somewhat over  
489 longer distances, particularly the tendency to erroneously weight past trials to estimate  
490 the current ones. Given that our two models, however, involved the same basic  
491 conceptual set-up (leg  $A+B=C$ ), these results suggest that the basic mechanism of adding  
492 vector values for the guided legs to compute a homing vector held constant across  
493 experiments.

494 In one previous study, participants were blindfolded and attempted to walk in a  
495 straight line for several hundred meters in a desert environment. In contrast to our  
496 findings, this study found that participants tended to walk in circles, even as early as 10  
497 meters into their 1 kilometer leg (Souman et al., 2009). This, in turn, might suggest that  
498 path integration mechanisms in humans undergo a form of catastrophic breakdown at  
499 longer distances. There are several key differences between our study and that of  
500 Souman et al., however. Perhaps most importantly, our study involved participants

501 encoding distances and angles they had turned to estimate a new vector back to the  
502 origin. Goal directed navigation involves fundamental differences from simply walking in  
503 a straight line (Klatzky et al., 1997), and it is possible that having a specific goal location  
504 in our task (return to the origin) reduced the tendency to walk in circles. Another important  
505 difference between our studies is that participants navigated on an omnidirectional  
506 treadmill while in the Souman et al. study, they navigated in the real-world (desert  
507 environment). Could our treadmill have prevented participants from taking circuitous  
508 paths? We analyzed all paths in the treadmill and did indeed find some examples of  
509 circuitous paths, suggesting that the treadmill interface itself did not preclude participants  
510 from employing this (Supplementary Figure 5). We also note that another study from the  
511 same group employed an omnidirectional treadmill interface, finding that participants  
512 walked in largely comparable ways to how they might in the real world (Souman et al.,  
513 2011). While we cannot rule out other differences between our experiments, we note that  
514 we found similar results for the triangle completion task in small-scale space as previously  
515 reported in room-sized environments, and thus we believe that the interface itself is  
516 unlikely to account for the differences in our findings. Instead, we favor an account based  
517 on the importance of using path integration mechanisms to find the origin.

518 Our computational modeling results indicated an effect of past trials on participant  
519 error patterns in Experiment 2 but not Experiment 1. In other words, for the longer  
520 distance triangles, we found a weak, but significant bias for past trials to influence the  
521 extent to which participants underestimated the amount they needed to walk on the  
522 current triangle. For large triangles, therefore, shorter past trials would result in a greater  
523 tendency to underestimate distance. Notably, including the history term in our model



524 significantly increased our ability to account for the increasing tendency of participants to  
525 undershoot the distance they needed to walk on the unguided leg. These findings support  
526 the idea that for particularly long distances, path integration is also influenced by a form  
527 of regression to the mean from past trials, thus explaining why undershoot increased with  
528 longer distances. These findings, which, to the best of our knowledge, have not been  
529 demonstrated previously at such long distances in humans, suggest that path integration  
530 is not merely a function of the current walked triangle, but is also influenced by the  
531 memories and experiences of past trajectories.

532         Because of our strong reliance on visual input, testing humans in the absence of  
533 vision is challenging, particular due the possibility of trip hazards and collisions. Thus,  
534 many researchers have chosen to investigate path integration using desktop VR, which  
535 also allows simultaneous brain imaging, for example, using fMRI (Chadwick, Jolly, Amos,  
536 Hassabis, & Spiers, 2015; Chrastil, Sherrill, Hasselmo, & Stern, 2015). One limitation  
537 with desktop VR, however, is that it lacks the rich cues that one obtains from freely moving  
538 the body in space (Starrett & Ekstrom, 2018). These include vestibular information from  
539 head turns, proprioceptive information about body position, efferent copy from motor  
540 movements, and somatosensory input from the feet as they move over the surface  
541 (Gallistel, 1990; Lackner & DiZio, 2005; Loomis & Beall, 1998; Matthis, Yates, & Hayhoe,  
542 2018; Visell, Giordano, Millet, & Cooperstock, 2011; Waller, Loomis, & Haun, 2004). Our  
543 novel interface was able to reproduce many of these cues, particularly those that would  
544 be expected from turning and shuffling the legs and feet. As such, we were able to  
545 capture novel aspects about non-visual navigation otherwise difficult to observe.  
546 Additionally, participants in our study generated their linear and angular motion, while

547 non-VR versions of the triangle completion task used in the past relied on the  
548 experimenter physically guiding the participant's movements. Previous versions of path  
549 completion task have used an object (rod or rope) in which the experimenter guides the  
550 participants by pulling or lowering for turning (Klatzky et al., 1990, Loomis et al. 1993,  
551 Klatzky et al., 1999). In contrast, in our design, participants received feedback from hand-  
552 held controllers indicating which way to go. We believe that the use of feedback via  
553 handheld controllers, rather than external forces to guide subjects, better approximates  
554 active walking. Specifically, active walking requires one to initiate the movement while  
555 outside forces that initiate or guide the movement would typically be referred to as  
556 passive. We believe by controlling for active walking during the guided portion, we have  
557 better controlled for differences between guided and unguided conditions. While the  
558 distinction between active and passive movement is a subtle one, recent work suggests  
559 important differences between these two forms of walking in terms of their neural bases  
560 (Carriot, Jamali, Brooks, & Cullen, 2015).

561

562 *Model comparisons: Vector addition models more plausible than Encoding-Error Model*

563 Vector addition has long been assumed to be the functioning principle for path  
564 integration (Cartwright & Collett, 1987; Etienne et al., 1998; Kubie & Fenton, 2009). The  
565 vector addition models proposed in this paper (Models 1&2) assume that the homing  
566 vector is updated by summing vector representations of legs A and B. In contrast, the  
567 Encoding-Error Model assumes that the homing vector is created using the distance and  
568 angle values experienced during the entire guided portion. While both models are similar  
569 in aim, we believe the computational principles for the vector model may be more

570 plausible. To employ the Encoding-Error Model, participants must form a representation  
571 of the linear relationship between distance guided and distance walked (distance  
572 representation) as well as for turns, for each path configuration across all subjects and  
573 trials. In addition, it is not clear whether the parameters of these linear functions  
574 generalize across studies and participants (Klatzky 1999). In contrast the Vector Addition  
575 Models assume a linear relationship between the guided leg and encoded vector, with  
576 the possibility of prior encoded vector values influencing the current trajectory.

577         As mentioned in the introduction, there are other reasons to think that vector  
578 addition models confer advantages, particularly in accounting for human path integration  
579 findings from the triangle completion task. The Encoding-Error Model has four  
580 requirements, with one important assumption being that the internal representations must  
581 obey Euclidean axioms. Recent papers, however, suggest that human spatial navigation,  
582 in some instances, may be better characterized by representations based on non-  
583 Euclidean labeled graphs (Warren, 2019). Specifically, Warren et al 2019 described path  
584 integration using simple vector manipulations with such manipulations preserved in non-  
585 Euclidean spaces. Our model, which can be readily adapted to non-Euclidean  
586 geometries, would therefore also provide greater flexibility than the Encoding-Error Model  
587 in terms of fitting violations of Euclidean axioms.

588         Another requirement of the Encoding-Error Model is the assumption that all  
589 systematic errors occur during encoding rather than during spatial reasoning or execution.  
590 Vector Addition Models are more flexible, assuming systematic errors can aggregate at  
591 different stages, whether it is during encoding, retrieval or computation of homing vector.

592 The Encoding Error Model, however, is limited in that leg A and B derive from the same  
593 linear function, such that leg A cannot be underestimated more than leg B. There may be  
594 instances, however, in which a leg is weighted differently in a path with 2 segments  
595 compared to 5 segments (Wan, Wang, & Crowell, 2013). In addition, the Encoding-Error  
596 Model is limited to 2 segmented triangular paths, based on the law of cosines (Appendix  
597 A), and does not perform well with 3 segmented paths (Fujita, Klatzky, Loomis, &  
598 Golledge, 1993). In contrast, vector addition models can readily be extended to n paths  
599 with the caveat of adding a free parameter with each segment. Notably, the vector  
600 addition models we employed here provided an overall better fit of the actual data  
601 (Supplementary figure 6 A&D), however the Encoding-Error model cannot be fully  
602 distinguished during model recovery (Supplementary figure 7). The likely reason for this  
603 is the small number of trials our task. While both Model 2 and Encoding-Error model can  
604 account for some patterns in the data, including systematic errors, importantly, Model 2  
605 has the best log-likelihood fit (supplementary figure 6 A & D), despite the Encoding-Error  
606 model having more free-parameter. Overall, therefore, we think the vector addition  
607 models provide a better fit of our data and are parsimonious although more work is  
608 needed to allow a detailed and formal model comparison.

609

### 610 *Limitations of the Vector Model*

611 While the vector addition models employed here do a fairly good job of capturing the  
612 patterns of our findings in the two experiments in this study, they are not without certain  
613 limitations. One issue is that the model in its current form assumes that Leg A and Leg  
614 B are encoded with similar directions (i.e.  $\beta_A x_A^t$  has the same direction as  $x_A^t$ ) or

615 opposite directions and only the vector magnitudes affect systematic errors. We hope to  
616 address the issue of vector directions in more detail in future models.

617

## 618 **Methods**

### 619 **Training and the triangle completion task**

620 All studies were approved by the UC Davis Institutional Review Board (IRB) with  
621 participants in some cases receiving class credit for their involvement. We employed a  
622 task used previously to investigate human path integration termed the triangle completion  
623 task (e.g., Loomis et al., 1993). Briefly, the task involves guiding participants on two legs  
624 of a triangle and then completing the third leg without guidance or feedback. Based on  
625 our goal of studying a variety of different triangle types and sizes, we adapted the task to  
626 an omnidirectional treadmill, the Cyberith Virtualizer treadmill. The task involved  
627 participants walking on the treadmill, with guidance on two of the legs provided by  
628 somatosensory feedback from HTC VIVE hand-held controllers. Participants wore the  
629 HTC VIVE headmounted headset to allow us to track head and body position, as well as  
630 to limit visual input.

631 To first ensure that participants could walk comfortably in the treadmill, we  
632 employed a pre-experimental training session. We employed an HTC VIVE head-  
633 mounted display to give visual feedback to ensure balance and comfort on the treadmill.  
634 In the first part of the training, we included a 3-stage puzzle game created in Unity  
635 2017.1.1f1 in which participants had to explore an environment to find an object. Once  
636 participants completed the 3-stage puzzle game, reported no cybersickness, and the  
637 experimenter determined that their walking technique was adequate, they advanced to

638 the next level. At this point, we introduced the HTC VIVE hand-held controllers feedback  
639 system (Figure 1B) and had subjects walk straight lines with no visual information while  
640 receiving feedback from the hand-held controllers. This insured that they could accurately  
641 perform the guided legs. Following this, they performed a small number of practice  
642 triangles. After practicing the triangle completion task on 6 unique triangles, which were  
643 not included in the experiment, the experiment started. The training period ranged from  
644 30-60 min. To ensure participant safety, we occasionally questioned them about how they  
645 were feeling to guard against issues with cybersickness.

646 Participants then proceeded to the main experiment. The first experiment involved  
647 manipulating triangle geometry (i.e., primarily the angles they turned) and Experiment 2  
648 involved manipulating triangle size (i.e., we manipulated the distance they walked on the  
649 third / unguided leg). Trial sequences were randomly chosen from 5 pseudorandomized  
650 configurations. In both experiments, we guided participants along the first two legs of the  
651 triangle using the hand-held controller feedback system (Figure 1B). The feedback  
652 system was designed such that if the participants strayed from their path, the controller  
653 vibrated accordingly to help guide them in walking in a straight line. When participants  
654 walked in the correct direction, the controller did not send feedback, allowing for active  
655 walking (passive guidance). Participants were guided along leg A' and then along leg B'  
656 by controller feedback (Figure 1C). At G2', the hand-held controller feedback system  
657 turned off and participants were instructed to find their way to the start point. Participants  
658 pressed the trigger on the handheld controllers once they believed that they reached the  
659 start point. We constructed trial specific vectors to capture the performance variability  
660 during guided legs (see Figure 1E). We manually inspected these trials, and those which

661 showed a clear deviation from linearity were excluded, which resulted in approximately  
662 16.5% ( $\frac{117}{696}$ ) of removal of trials from Experiment 1 and 6.88% ( $\frac{36}{523}$ ) from Experiment 2  
663 across participants. Participant data that exceeded 25% removed trials were excluded  
664 from the analysis. We redid the analysis by including all trials and participants and  
665 obtained similar results to what are reported here.

666

## 667 **Modeling**

### 668 ***Description of models***

669 To further understand how the guided legs contributed to the angle and distance  
670 errors of the unguided leg, we created a vector model of path integration. In this model,  
671 we assume that participants estimate a “homing vector”,  $x_C^t$ , by combining the vectors  
672 corresponding to each of the guided legs for that trial (t),  $x_A^t$  and  $x_B^t$ . If path integration  
673 were optimal, people would combine these vectors in the following way

674 
$$1. x_C^t = -(x_A^t + x_B^t)$$

675 and would return perfectly to the point of origin by walking along the vector  $x_C^t$ .

676 We assumed that people could over, or underweight, a given leg when computing the  
677 sum – perhaps because they integrate evidence unevenly over time (Keung, Hagen, &  
678 Wilson, 2019). To model this suboptimality, we allowed  $x_D^t$  to be a *weighted* sum of the  
679 vectors from the first two legs:

680 
$$2. x_D^t = -(\beta_A x_A^t + \beta_B x_B^t)$$

681 Where  $\beta_A$  and  $\beta_B$  denote the weights given to leg A and leg B respectively (Figure 1D).  
682 Combining the first two suboptimalities gives us Model 1, which includes noise and the  
683 possibility of over and underweighting the legs.

684 Of course, real participants are suboptimal and we modeled these suboptimalities  
685 in a number of different ways. First, people may not perfectly encode the vectors from  
686 the guided legs and/or may not perfectly implement the desired action, adding noise to  
687 the sum in equation 1. Thus, we assumed that the vector they actually walked  $x_D^t$  was  
688 sampled from a Gaussian distribution centered on  $x_C^t$ , i.e.

$$689 \quad 3. \quad P(x_D^t | x_C^t) = \frac{1}{\sqrt{2\pi\sigma^2}} \exp\left(-\frac{(x_D^t - x_C^t)^2}{2\sigma^2}\right)$$

690 Where  $\sigma^2$  is the variance of the noise. Consistent with Weber's law, we assumed this  
691 variance increased with the distance walked to match our finding of increased variance  
692 as a factor of distance walked in Experiment 2 (see Results, Figure 7B).

$$693 \quad 4. \quad \sigma = \tilde{\sigma} * \sqrt{x_A^{t^2} + x_B^{t^2}}$$

694 Finally, we allowed for the possibility that there may be sequential effects in our  
695 paradigm, i.e. there was an influence of previous trials on the current response. We  
696 modeled these sequential effects by including the vectors walked ( $x_A^{t-n}$ ,  $x_B^{t-n}$  and  $x_D^{t-n}$ )  
697 from past trials. For simplicity, we assumed that the effect of past trials decayed  
698 exponentially into the past (Lau & Glimcher, 2005), thus writing  $x_C^t$  as

$$699 \quad 5. \quad x_D^t = -(\beta_A x_A^t + \beta_B x_B^t + \beta_\chi [\chi_A^{t-1} + \chi_B^{t-1} - \chi_D^{t-1}])$$

$$700 \quad 6. \quad \chi_n^t = x_n^t + \alpha \chi_n^{t-1}$$

701 Where  $\chi_n$  is a linear combination of the previous vectors, fitted with  $\alpha$ , which ranges  
702 between 0 to 1, to capture the impact of prior trials. Thus, including the possible effect of  
703 past trials gave us Model 2.

704 *Fitting the model*



705 We fit the model using a maximum likelihood approach. In particular, we computed the  
706 log likelihood of the responses for each subject, as a function of model parameters:

707 
$$7. LL(\tilde{\sigma}, \beta, \alpha) = \sum_{t=1}^T \frac{\log(2\pi\sigma^2)}{2} \frac{(x_D^t - x_C^t)^2}{4\sigma^2}$$

708 We then found the parameters that maximized the likelihood using Matlab's fmincon  
709 function.

710

### 711 *Simulating the models*

712 To simulate the model, we used the parameter values fit for each subject to compute the  
713 mean  $x_C^t$  for each trial. To model the noise in each person's choice, we perturbed the  
714 estimate of  $x_D^t$  by isotropic Gaussian noise of mean 0 and variance  $\sigma^2$ .

715

### 716 *Encoding-Error Model*

717 We recreated the Encoding-Error Model from Fujita et al. 1993. See Appendix A for more  
718 details. We used the same fitting and simulation method used for Model 1 and Model 2  
719 with the exception of dividing the data for left and right-handed triangle to better  
720 accommodate the parameters of the Encoding-Error Model (see Klatzky et al. 1999).

721

### 722 *Model Comparison Methods*

723 We used two methods of model comparisons: 1) Penalized-Log-likelihood criteria's Bayes  
724 Information Criterion (BIC) (Schwarz et al., 1978) and Akaike information criterion (AIC)  
725 (Akaike, 1974). Both express similar information about the generalizability of the model  
726 by penalizing for the number of free parameters. To test how meaningful our model  
727 comparisons results are in our task we also tested for model recovery. We did this by

728 simulating each model with randomized parameter values and then fitting the models to  
729 the simulated data, allowing comparison of the AIC and BIC (see Wilson & Collins 2019  
730 section 6 and Appendix B). We performed each simulation at the participant level and  
731 then subsequently compared BIC values by calculating exceedance probabilities, which  
732 measured how likely it is that the given model fits all of the data (Rigoux et al., 2014). This  
733 group level statistic is similar to AIC and BIC. Computed exceedance probabilities on our  
734 data as well as each model by simulating 100 times and comparing with the methods  
735 mentioned above. These methods are illustrated in Supplementary Figure 6 where the  
736 probability of the model fit for the simulated data ranges from 0 to 1. The Exceedance  
737 Probability is calculated using SPM 12 `spm_BMS` function.

738

### 739 *Bayes Factor Analyses*

740 We included a Bayes Factor analysis for all statistical analyses (Rouder, Speckman, Sun,  
741 Morey, & Iverson, 2009). For results below our significance threshold ( $p < 0.05$ ), we used  
742 a Bayes Factor  $BF_{10}$  to indicate the degree of favorability toward the alternative  
743 hypothesis. For results that were not below our significance threshold, we employed the  
744 Bayes Null factor,  $BF_{01}$ . Note that the larger the Bayes Factor, regardless of whether in  
745 favor of the alternative or null, the greater the evidence.

746

## 747 **Experiment 1**

### 748 *Participants*

749 We tested a total of 26 participants (12m, 14f), 4 (1m, 3f) of which were removed due to  
750 exceeding 25% of trials removed (see methods), Participants were tested on 7 different

751 triangles described in detail in the methods (i.e., scalene, isosceles, right, equilateral, and  
752 isosceles-right). Estimates of sample size were based on the 12 participants used in  
753 Loomis et al. 1993 and in subsequent studies by Yamamoto 2013 et al. that employed a  
754 similar experimental design: as we were additionally testing a larger range of triangles,  
755 we thus approximately doubled the sample size.

756

### 757 *Procedure*

758 We outline the basic set up for triangle geometry in Figure 1E, which shows the stacked  
759 triangle templates, with a constant 10m leg C' (unguided leg), while manipulating the angle.  
760 The 7 triangle configurations are shown in Supplementary Table 1A, with 3 scalene, 1  
761 isosceles, 1 right, 1 equilateral, and 1 isosceles-right. To keep leg C' at 10m across all 7  
762 triangles, we employed different leg A' and leg B' sizes to accommodate the different  
763 angles. There were 28 trials, in which 14 of them were left-handed (subjects only made  
764 left turn) and 14 right handed (subject only made right turns). We did this to avoid any  
765 advantages for right vs. left turns during the task.

766 In Experiment 1, as part of ensuring the compliance and efficacy of the hand-held  
767 controllers in following the guided legs, we compared with a condition in which  
768 participants walked the guided legs on half the trials using a visual beacon. In this  
769 situation, participants saw a large red monolith that they walked to while receiving  
770 feedback from the handheld controllers. It is important to emphasize that the vision-  
771 guided trials were only present for the *guided* legs and were simply to ensure that  
772 participants accurately encoded the guided legs before performing the unguided legs.

773

774 **Experiment 2:**

775 *Participants*

776 We tested a total of 21 participants (9m,11f), 3 (1m 2f) of which did not complete the  
777 experiment, with additional 1 female participant removed from the analysis for exceeding  
778 25% trials below criterial performance. Given the longer distances in Experiment 2,  
779 participants were allowed to take a break, but only at the end of a trial. About 50% of  
780 participants took a break at some point during the experiment.

781

782 *Procedure*

783 Here, we employed scalene triangles with different length perimeters to allow us to  
784 manipulate distance while keeping angle relatively constant, testing 5 different triangle  
785 sizes. Figure 1F shows the stacked triangle templates we employed with constant  
786 internal angles but varying in size. The triangle configurations are shown in  
787 Supplementary Table 1B, with 15m, 25m, 127m, 253m, and 506m perimeters. There were  
788 30 trials, with 15 of them left-handed (participants only made left turn) and 15 right-handed  
789 (participants only made right turns). Unlike Experiment 1, there were no vision trials. Due  
790 to testing longer distances and wanting to avoid fatigue, we limited the number of trials  
791 for the longest distance triangles. The distributions of trials were 10 for the 15m triangle,  
792 10 for the 25m triangle, 8 for the 127m triangle, 4 for the 253m triangle, and 2 for the  
793 506m triangle.

794 All data files are available at: [github.com/sharootonian/PA-TCT](https://github.com/sharootonian/PA-TCT)

795

796 *\*Acknowledgements\_*

797 The Authors are grateful to E. Erlenbach for helping during data collection. Research supported  
798 by grants from NSF Division of Behavioral and Cognitive Sciences [BCS-1630296] awarded to  
799 Arne Ekstrom.

## References

- 800  
801
- 802 Alyan, S., & Jander, R. (1994). Short-range homing in the house mouse, *Mus musculus*:  
803 stages in the learning of directions. *Animal Behaviour*, 48(2), 285-298.  
804 doi:<https://doi.org/10.1006/anbe.1994.1242>
- 805 Bellmund, J. L. S., Gärdenfors, P., Moser, E. I., & Doeller, C. F. (2018). Navigating  
806 cognition: Spatial codes for human thinking. *Science*, 362(6415), eaat6766.  
807 doi:10.1126/science.aat6766
- 808 Beritashvili, I. S. (1965). Neural mechanisms of higher vertebrate behavior.
- 809 Biederman, I. (1987). Recognition-by-components: a theory of human image  
810 understanding. *Psychol Rev*, 94(2), 115-147.
- 811 Carriot, J., Jamali, M., Brooks, J. X., & Cullen, K. E. (2015). Integration of Canal and  
812 Otolith Inputs by Central Vestibular Neurons Is Subadditive for Both Active and  
813 Passive Self-Motion: Implication for Perception. *Journal of Neuroscience*, 35(8),  
814 3555-3565. doi:10.1523/Jneurosci.3540-14.2015
- 815 Cartwright, B. A., & Collett, T. S. (1987). Landmark maps for honeybees. *Biological*  
816 *Cybernetics*, 57(1), 85-93. doi:10.1007/bf00318718
- 817 Chadwick, M. J., Jolly, A. E. J., Amos, D. P., Hassabis, D., & Spiers, H. J. (2015). A  
818 Goal Direction Signal in the Human Entorhinal/Subicular Region. *Current*  
819 *Biology*, 25(1), 87-92. doi:10.1016/j.cub.2014.11.001
- 820 Chance, S. S., Gaunet, F., Beall, A. C., & Loomis, J. M. (1998). Locomotion mode  
821 affects the updating of objects encountered during travel: The contribution of  
822 vestibular and proprioceptive inputs to path integration. *Presence-Teleoperators*  
823 *and Virtual Environments*, 7(2), 168-178. doi:10.1162/105474698565659
- 824 Chen, X., He, Q., Kelly, Jonathan W., Fiete, Ila R., & McNamara, Timothy P. (2015).  
825 Bias in Human Path Integration Is Predicted by Properties of Grid Cells. *Current*  
826 *Biology*, 25(13), 1771-1776. doi:<https://doi.org/10.1016/j.cub.2015.05.031>
- 827 Cheng, K. (1986). A purely geometric module in the rat's spatial representation.  
828 *Cognition*, 23(2), 149-178. doi:[https://doi.org/10.1016/0010-0277\(86\)90041-7](https://doi.org/10.1016/0010-0277(86)90041-7)
- 829 Cheung, A., Ball, D., Milford, M., Wueth, G., & Wiles, J. (2012). Maintaining a Cognitive  
830 Map in Darkness: The Need to Fuse Boundary Knowledge with Path Integration.  
831 *PLoS Comput Biol*, 8(8), 1-22.
- 832 Chrastil, E. R., Sherrill, K. R., Hasselmo, M. E., & Stern, C. E. (2015). There and Back  
833 Again: Hippocampus and Retrosplenial Cortex Track Homing Distance during  
834 Human Path Integration. *Journal of Neuroscience*, 35(46), 15442-15452.  
835 doi:10.1523/Jneurosci.1209-15.2015

- 836 Darwin, C. (1856/1987). *Charles Darwin's natural selection: being the second part of his*  
837 *big species book written from 1856 to 1858*: Cambridge University Press.
- 838 Ekstrom, A. D., Spiers, H. J., Bohbot, V. D., & Rosenbaum, R. S. (2018). *Human Spatial*  
839 *Navigation*: Princeton University Press.
- 840 Etienne, A. S. (1987). The Control of Short-Distance Homing in the Golden Hamster. In  
841 P. Ellen & C. Thinus-Blanc (Eds.), *Cognitive Processes and Spatial Orientation in*  
842 *Animal and Man: Volume I Experimental Animal Psychology and Ethology* (pp.  
843 233-251). Dordrecht: Springer Netherlands.
- 844 Etienne, A. S., Maurer, R., Berlie, J., Reverdin, B., Rowe, T., Georgakopoulos, J., &  
845 Séguinot, V. (1998). Navigation through vector addition. *Nature*, 396(6707), 161-  
846 164. doi:10.1038/24151
- 847 Etienne, A. S., Maurer, R., & Séguinot, V. (1996). Path integration in mammals and its  
848 interaction with visual landmarks. *The Journal of Experimental Biology*, 199(1),  
849 201-209. Retrieved from <https://jeb.biologists.org/content/jexbio/199/1/201.full.pdf>
- 850 Fujita, N., Klatzky, R. L., Loomis, J. M., & Golledge, R. G. (1993). The Encoding-Error  
851 Model of Pathway Completion without Vision. *Geographical Analysis*, 25(4), 295-  
852 314.
- 853 Gallistel, C. R. (1990). *The Organization of Learning*. Cambridge, MA: MIT Press.
- 854 Görner, P. (1958). Die optische und kinästhetische Orientierung der Trichterspinn  
855 *Agelena Labyrinthica* (Cl.). *Zeitschrift für vergleichende Physiologie*, 41(2), 111-  
856 153. doi:10.1007/bf00345583
- 857 Green, J., Adachi, A., Shah, K. K., Hirokawa, J. D., Magani, P. S., & Maimon, G. (2017).  
858 A neural circuit architecture for angular integration in *Drosophila*. *Nature*, 546,  
859 101. doi:10.1038/nature22343
- 860 Hafting, T., Fyhn, M., Molden, S., Moser, M.-B., & Moser, E. I. (2005). Microstructure of  
861 a spatial map in the entorhinal cortex. *Nature*, 436(7052), 801.
- 862 Keung, W., Hagen, T. A., & Wilson, R. C. (in press). Regulation of evidence  
863 accumulation by pupil-linked arousal processes. *Nature Human Behavior*.
- 864 Klatzky, R. L., Loomis, J. M., & Golledge, R. G. (1997). Encoding spatial  
865 representations through nonvisually guided locomotion. In Medin (Ed.), *The*  
866 *psychology of learning and motivation* (Vol. 37): Academic Press.
- 867 Klatzky, R. L., Loomis, J. M., Golledge, R. G., Cicinelli, J. G., Doherty, S., & Pellegrino,  
868 J. W. (1990). Acquisition of route and survey knowledge in the absence of vision.  
869 *Journal of motor behavior*, 22(1), 19-43.
- 870 Klatzky, R. L., Beall, A. C., Loomis, J. M., Golledge, R. G., & Philbeck, J. W. (1999).  
871 Human navigation ability: Tests of the encoding-error model of path integration.  
872 *Spatial Cognition and Computation*, 1(1), 31-65. doi:10.1023/a:1010061313300

- 873 Kubie, J. L., & Fenton, A. A. (2009). Heading-vector navigation based on head-direction  
874 cells and path integration. *Hippocampus*, 19(5), 456-479. doi:10.1002/hipo.20532
- 875 Lackner, J. R., & DiZio, P. (2005). Vestibular, proprioceptive, and haptic contributions to  
876 spatial orientation. *Annu. Rev. Psychol.*, 56, 115-147.
- 877 Landau, B., Gleitman, H., & Spelke, E. (1981). Spatial knowledge and geometric  
878 representation in a child blind from birth. *Science*, 213(4513), 1275-1278.
- 879 Lau, B., & Glimcher, P. W. (2005). Dynamic response-by-response models of matching  
880 behavior in rhesus monkeys. *J Exp Anal Behav*, 84(3), 555-579.
- 881 Lindauer, M. (1963). Kompaßorientierung. In H. Autrum, E. Bünning, K. v. Frisch, E.  
882 Hadorn, A. Kühn, E. Mayr, A. Pirson, J. Straub, H. Stubbe, & W. Weidel (Eds.),  
883 Orientierung der Tiere / Animal Orientation: Symposium in Garmisch-  
884 Partenkirchen 17.–21. 9. 1962 (pp. 158-181). Berlin, Heidelberg: Springer Berlin  
885 Heidelberg.
- 886 Logothetis, N. K., & Sheinberg, D. L. (1996). Visual object recognition. *Annual Review*  
887 *of Neuroscience*, 19, 577-621.
- 888 Loomis, J. M., & Beall, A. C. (1998). Visually controlled locomotion: Its dependence on  
889 optic flow, three-dimensional space perception, and cognition. *Ecological*  
890 *Psychology*, 10(3-4), 271-285. doi:DOI 10.1207/s15326969eco103&4\_6
- 891 Loomis, J. M., Klatzky, R. L., Golledge, R. G., Cicinelli, J. G., Pellegrino, J. W., & Fry, P.  
892 A. (1993). Nonvisual navigation by blind and sighted: assessment of path  
893 integration ability. *J Exp Psychol Gen*, 122(1), 73-91.
- 894 Matthis, J. S., Yates, J. L., & Hayhoe, M. M. (2018). Gaze and the Control of Foot  
895 Placement When Walking in Natural Terrain. *Current Biology*, 28(8), 1224-+.  
896 doi:10.1016/j.cub.2018.03.008
- 897 Milivojevic, B., & Doeller, C. F. (2013). Mnemonic networks in the hippocampal  
898 formation: From spatial maps to temporal and conceptual codes. *Journal of*  
899 *Experimental Psychology: General*, 142(4), 1231.
- 900 Mittelstaedt, H. (1983). The role of multimodal convergence in homing by path  
901 integration. *Fortschritte der Zoologie*, 28, 197-212.
- 902 Mittelstaedt, H., & Mittelstaedt, M.-L. (1982). Homing by Path Integration, Berlin,  
903 Heidelberg.
- 904 Mittelstaedt, M. L., & Mittelstaedt, M. L. (1980). Homing by path integration in a  
905 mammal. *Naturewissenschaften*, 67(566).
- 906 Moar, I., & Bower, G. H. (1983). Inconsistency in Spatial Knowledge. *Memory &*  
907 *Cognition*, 11(2), 107-113. doi:Doi 10.3758/Bf03213464



- 908 Newman, E. L., Caplan, J. B., Kirschen, M. P., Korolev, I. O., Sekuler, R., & Kahana, M.  
909 J. (2007). Learning your way around town: how virtual taxicab drivers learn to  
910 use both layout and landmark information. *Cognition*, *104*(2), 231-253.
- 911 Moser, E. I., & Moser, M.-B. (2008). A metric for space. *Hippocampus*, *18*(12), 1142-  
912 1156. doi:10.1002/hipo.20483
- 913 Müller, M., & Wehner, R. (1988). Path integration in desert ants, *Cataglyphis*  
914 *fortis*. *Proceedings of the National Academy of Sciences*, *85*(14), 5287-  
915 5290. doi:10.1073/pnas.85.14.5287
- 916 Palminteri, S., Wyart, V., & Koechlin, E. (2017). The Importance of Falsification in  
917 Computational Cognitive Modeling. *Trends Cogn Sci*, *21*(6), 425-433.  
918 doi:10.1016/j.tics.2017.03.011
- 919 Petzschner, F. H., & Glasauer, S. (2011). Iterative Bayesian Estimation as an  
920 Explanation for Range and Regression Effects: A Study on Human Path  
921 Integration. *The Journal of Neuroscience*, *31*(47), 17220-17229.  
922 doi:10.1523/jneurosci.2028-11.2011
- 923 Philbeck, J. W., Klatzky, R. L., Behrmann, M., Loomis, J. M., & Goodridge, J. (2001).  
924 Active control of locomotion facilitates nonvisual navigation. *J Exp Psychol Hum*  
925 *Percept Perform*, *27*(1), 141-153.
- 926 Redish, A. D. (1999). Beyond the cognitive map: from place cells to episodic memory.
- 927 Rouder, J. N., Speckman, P. L., Sun, D. C., Morey, R. D., & Iverson, G. (2009).  
928 Bayesian t tests for accepting and rejecting the null hypothesis. *Psychonomic*  
929 *Bulletin & Review*, *16*(2), 225-237. doi:10.3758/Pbr.16.2.225
- 930 Seguinot, V., Cattet, J., & Benhamou, S. (1998). Path integration in dogs. *Animal*  
931 *Behaviour*, *55*(4), 787-797. doi:https://doi.org/10.1006/anbe.1997.0662
- 932 Souman, J. L., Frissen, I., Sreenivasa, M. N., & Ernst, M. O. (2009). Walking Straight  
933 into Circles. *Current Biology*, *19*(18), 1538-1542. doi:Doi  
934 10.1016/J.Cub.2009.07.053
- 935 Souman, J. L., Giordano, P. R., Schwaiger, M., Frissen, I., Thümmel, T., Ulbrich, H., . . .  
936 Ernst, M. O. (2011). CyberWalk: Enabling unconstrained omnidirectional walking  
937 through virtual environments. *ACM Transactions on Applied Perception (TAP)*,  
938 *8*(4), 25.
- 939 Starrett, M. J., & Ekstrom, A. D. (2018). Perspective: Assessing the Flexible Acquisition,  
940 Integration, and Deployment of Human Spatial Representations and Information.  
941 *Frontiers in Human Neuroscience*, *12*.
- 942 Taube, J. S., Valerio, S., & Yoder, R. M. (2013). Is Navigation in Virtual Reality with  
943 fMRI Really Navigation? *Journal of Cognitive Neuroscience*.  
944 doi:10.1162/jocn\_a\_00386



- 945 Teghtsoonian, R., & Teghtsoonian, M. (1978). Range and regression effects in  
946 magnitude scaling. *Perception & Psychophysics*, 24(4), 305-314.  
947 doi:10.3758/bf03204247
- 948 Tolman, E. C. (1948). Cognitive maps in rats and men. *Psychological Review*, 55(4),  
949 189-208. doi:10.1037/h0061626
- 950 Visell, Y., Giordano, B. L., Millet, G., & Cooperstock, J. R. (2011). Vibration Influences  
951 Haptic Perception of Surface Compliance During Walking. *PLoS One*, 6(3).  
952 doi:ARTN e1769710.1371/journal.pone.0017697
- 953 Waller, D., Loomis, J. M., & Haun, D. B. M. (2004). Body-based senses enhance  
954 knowledge of directions in large-scale environments. *Psychonomic Bulletin &  
955 Review*, 11(1), 157-163. doi:Doi 10.3758/Bf03206476
- 956 Warren, W. H. (2019). Non-Euclidean navigation. *The Journal of Experimental Biology*,  
957 222(Suppl 1), jeb187971. doi:10.1242/jeb.187971
- 958 Wan, X., Wang, R. F., & Crowell, J. A. (2013). Effects of Basic Path Properties on  
959 Human Path Integration. *Spatial Cognition & Computation*, 13(1), 79-101.  
960 doi:10.1080/13875868.2012.678521
- 961 Wehner, R., & Srinivasan, M. V. (1981). Searching behaviour of desert ants,  
962 genus *Cataglyphis* (Formicidae, Hymenoptera). *Journal of comparative  
963 physiology*, 142(3), 315-338. doi:10.1007/bf00605445
- 964 Wehner, R., & Wehner, S. (1986). Path integration in desert ants. Approaching a long-  
965 standing puzzle in insect navigation. *Monitore Zoologico Italiano-Italian Journal of  
966 Zoology*, 20(3), 309-331.
- 967 Wehner, R., & Wehner, S. (1990). Insect navigation: use of maps or Ariadne's thread?  
968 *Ethology Ecology & Evolution*, 2(1), 27-48.
- 969 Wilson, R. C., & Collins, A. (2019). *Ten simple rules for the computational modeling of  
970 behavioral data*. . PsyArXiv.
- 971 Wittmann, T., & Schwegler, H. (1995). Path integration — a network model. *Biological  
972 Cybernetics*, 73(6), 569-575. doi:10.1007/bf00199549
- 973 Yamamoto, N., Philbeck, J. W., Woods, A. J., Gajewski, D. A., Arthur, J. C., Potolicchio,  
974 S. J., . . . Caputy, A. J. (2014). Medial Temporal Lobe Roles in Human Path  
975 Integration. *PLoS One*, 9(5). doi:ARTN e9658310.1371/journal.pone.0096583
- 976
- 977
- 978

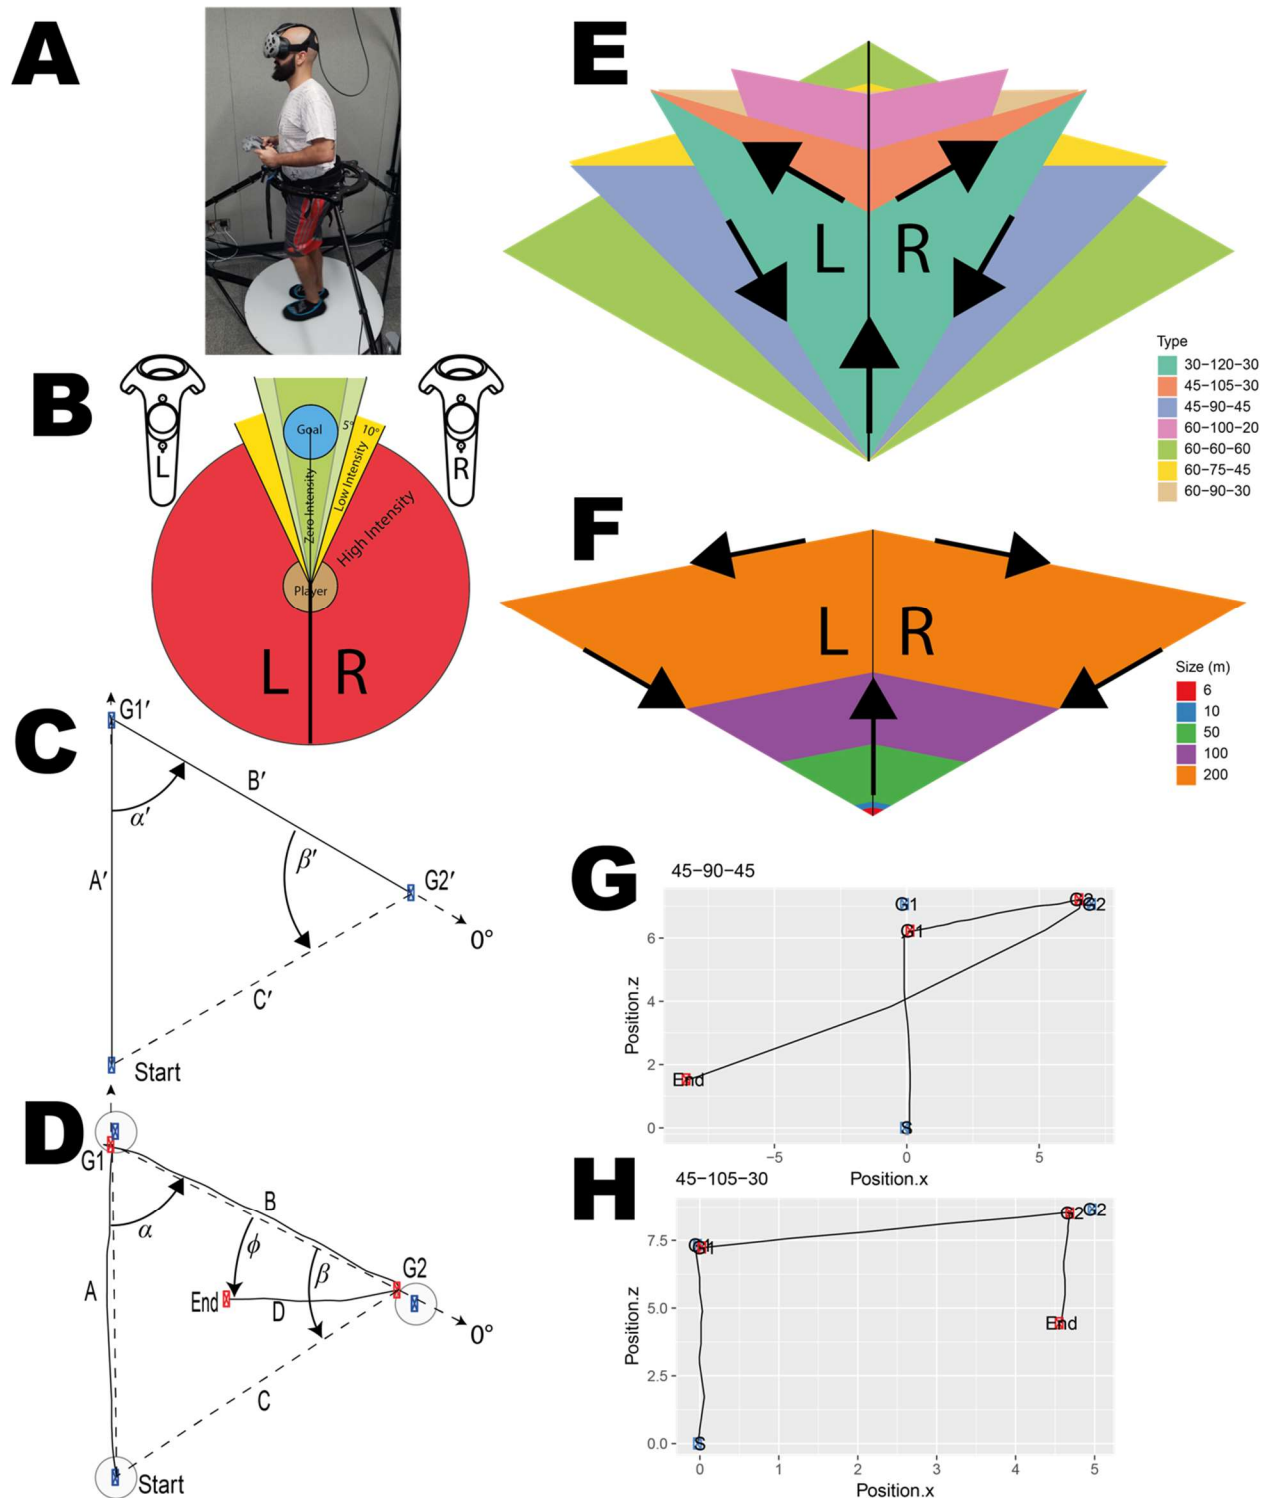

979

980 *Figure 1 (A) HTC VIVE head set along with the handheld controllers using in the experiments, combined with Cyberith*  
 981 *Virtualizer treadmill system to track participants in a much larger virtual environment while in stationary*  
 982 *ambulation. (B) Visualization of HTC VIVE hand-held controllers feedback intensity based on the deviation of the angle.*  
 983 *(C) Depiction of an equilateral triangle used in experiment 1. (D) Raw trace of participant's path overlaid on the vector*  
 984 *distances (dashed lines) between the points. The blue denotes the G1' and G2' locations that subject is being guided*  
 985 *to and the red points are the subject's unique G1 and G2 locations for that trial. (E) Triangle templates used in experiment*

986 *1 overlaid on top of each other and the legend denoting the internal angles. (F) Triangle templates used in experiment*  
987 *1 overlaid on top of each other and the legend denoting the length of side C. (G) Raw trial where the participant over*  
988 *estimated distance and the angle. (H) Raw trial where the participant underestimated the distance and the angle*

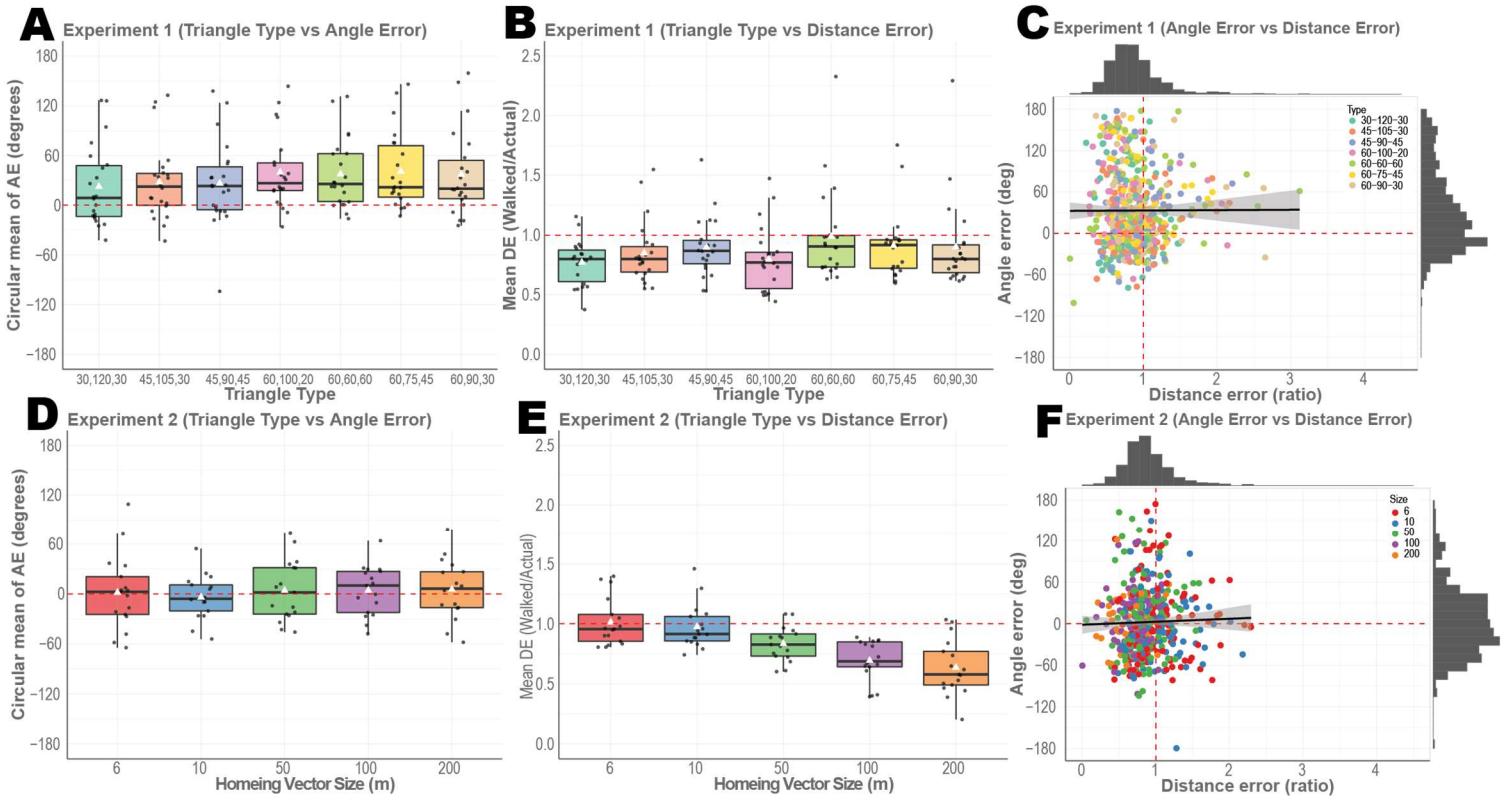

989

990 *Figure 2: White triangles represent the mean while the median is shown as a black bar. (A) Circular mean of angle*  
 991 *error for the 7 triangle types from experiment 1 ( $F(6,21)=2.9, p<0.01, \eta^2 =0.058, BF_{10}=1.72$ ). (B) Mean distance error*  
 992 *for the unguided walk from experiment 1 ( $F(6, 21)=2.1, p<0.1.33e-5, \eta^2=0.109, BF_{10}>10$ ). (C) Angle error and*  
 993 *Distance error of all trials from experiment 1 showing no correlation ( $t(579)=0.084, p=0.933, BF_{01}>10$ ). (D) Circular*  
 994 *mean of angle error for the 5 triangle sizes ( $F(4, 16)=0.609, p=0.658, \eta^2 =0.036, BF_{01}>10$ ). (E) Mean distance error for*  
 995 *the unguided walk from experiment 2 ( $F(4, 16)=21.107, p<3.913e-11, \eta^2 =0.553$  and  $BF_{10}>10$ ). (F) Angle error and*  
 996 *Distance error of all trials from experiment 2 showing no correlation ( $t(487)=0.623, p=0.533, BF_{01}>7.8$ ).*

997

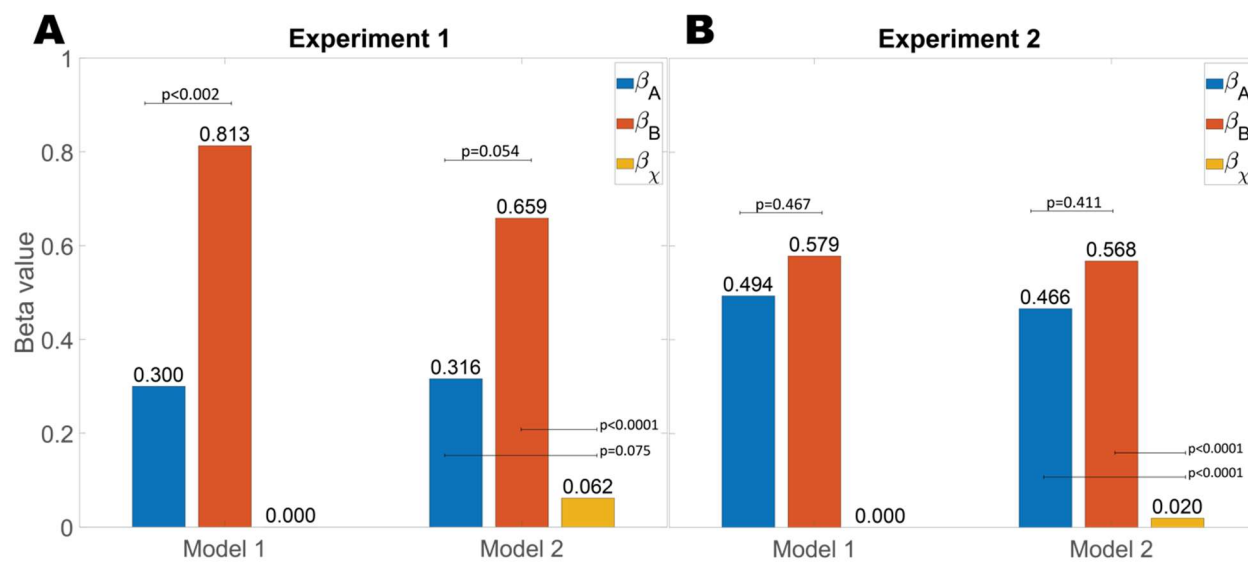

998

999 *Figure 3 Mean Beta values from the vector model for (A): experiment 1 and (B): experiment 2.*

1000

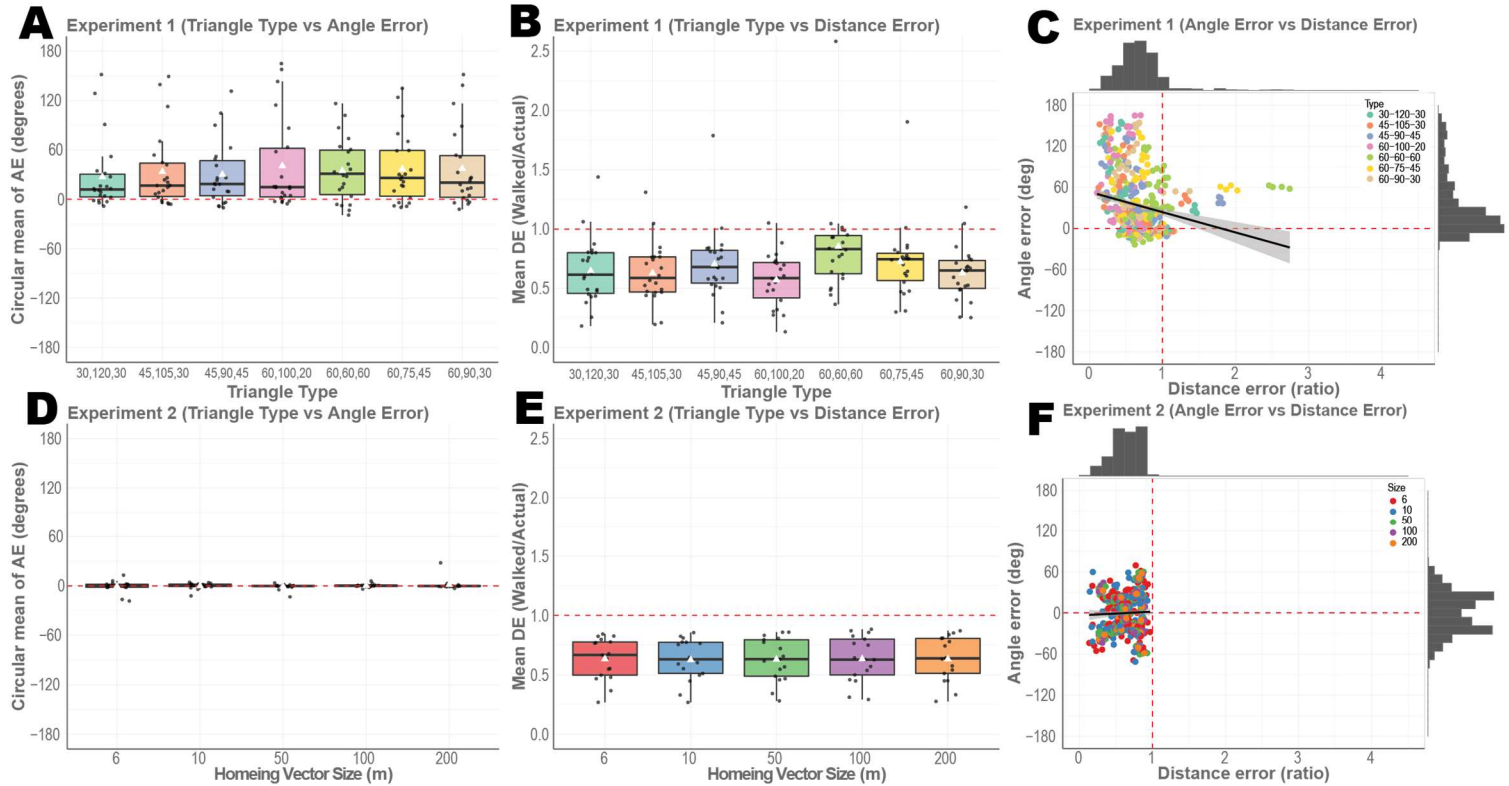

1001

1002 *Figure 4: White triangles represent the mean while the median is shown as a black bar. Simulated data from Model 1*  
 1003 *(A)Circular mean of angle error for the 7 triangle types from experiment 1. (B)Mean distance error for the unguided*  
 1004 *walk from experiment 1. (C) Angle error and Distance error of all trials from experiment 1 showing no correlation.*  
 1005 *(D)Circular mean of angle error for the 5 triangle sizes. (E) Mean distance error for the unguided walk from*  
 1006 *experiment 2. (F) Angle error and Distance error of all trials from experiment 2 showing no correlation.*

1007

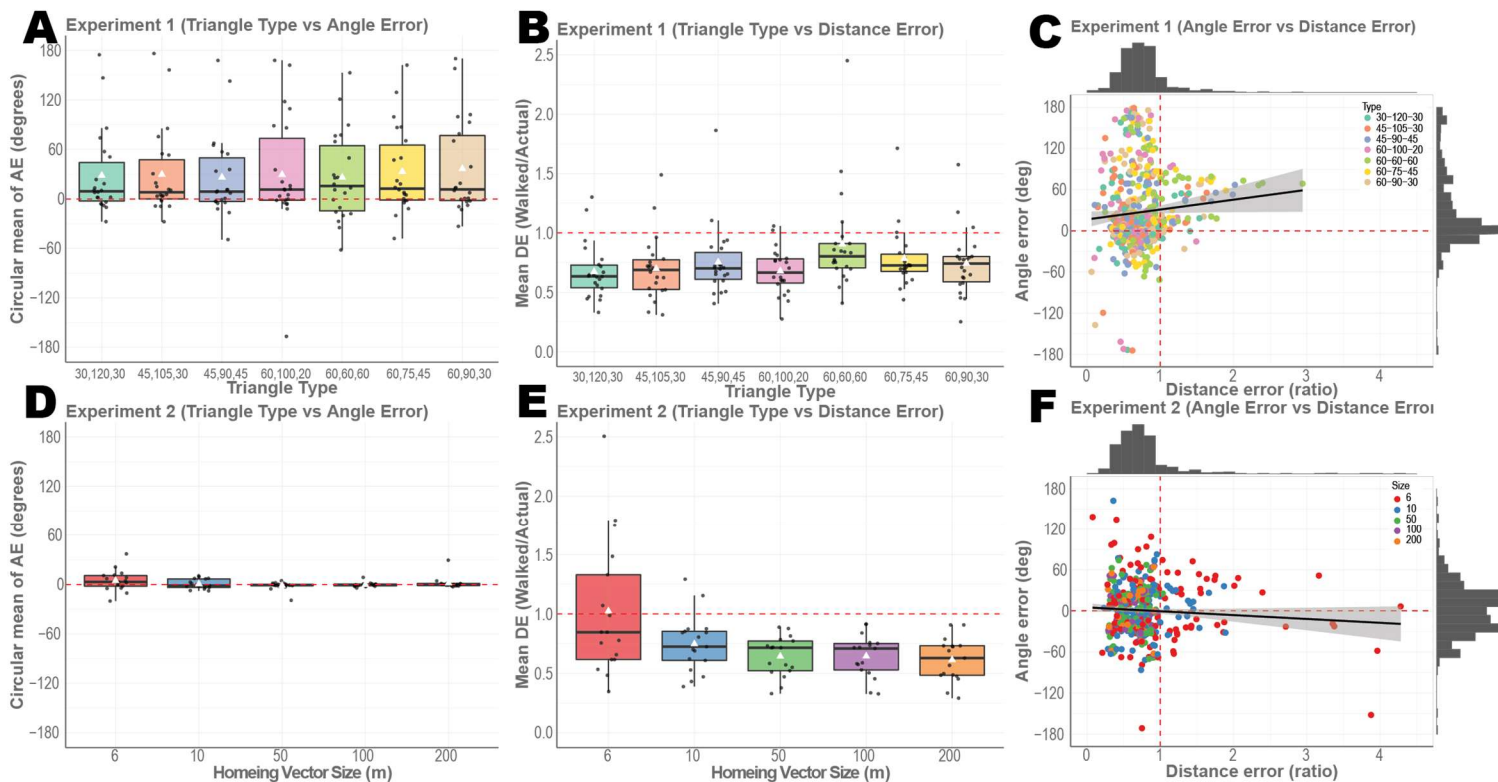

1008

1009 *Figure 5: White triangles represent the mean while the median is shown as a black bar. Simulated data from Model 2*  
 1010 *(A)Circular mean of angle error for the 7 triangle types from experiment 1. (B)Mean distance error for the unguided*  
 1011 *walk from experiment 1. (C) Angle error and Distance error of all trials from experiment 1 showing no correlation.*  
 1012 *(D)Circular mean of angle error for the 5 triangle sizes. (E) Mean distance error for the unguided walk from*  
 1013 *experiment 2. (F) Angle error and Distance error of all trials from experiment 2 showing no correlation.*

1014



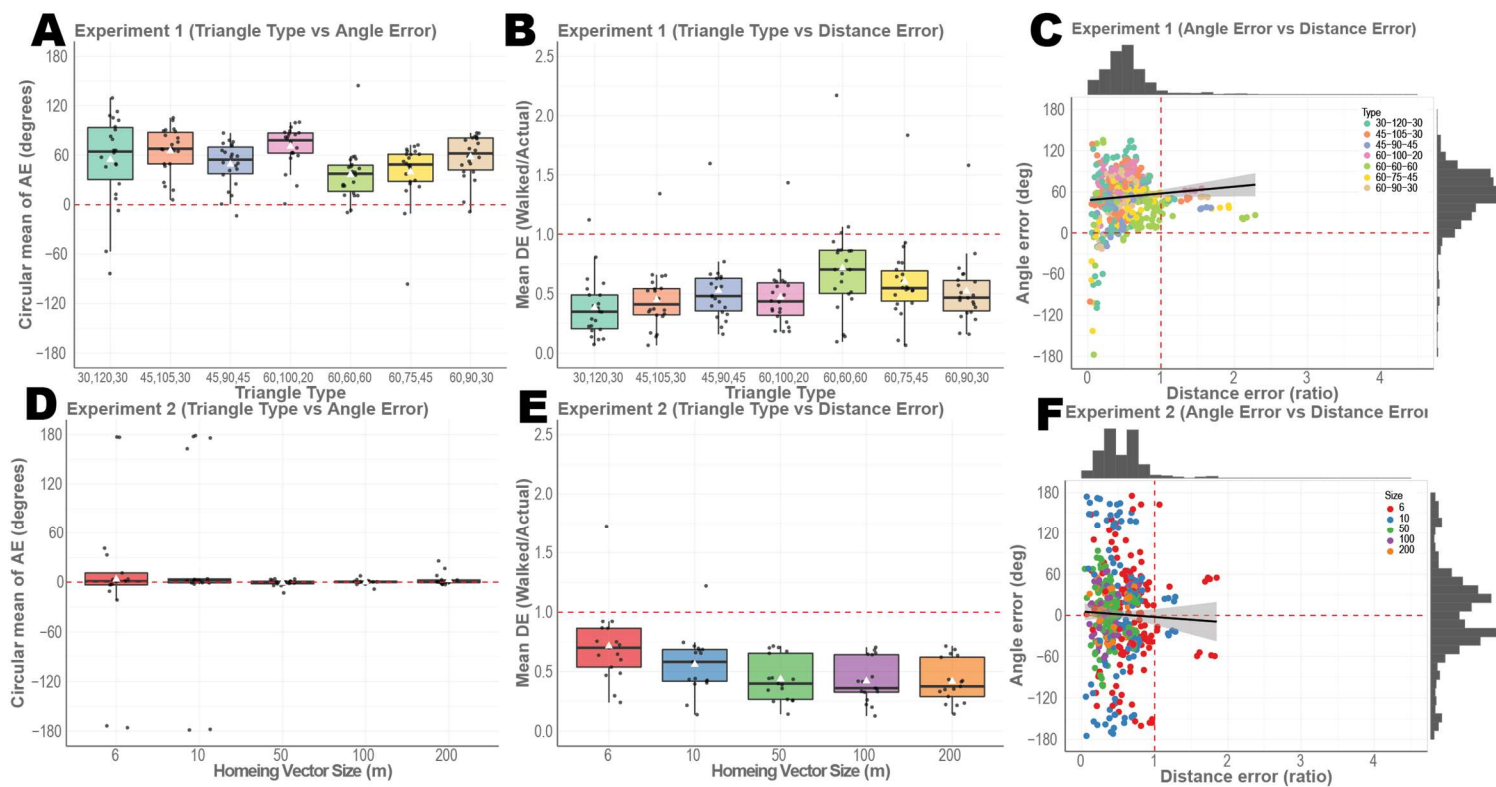

1015

1016 *Figure 6: White triangles represent the mean while the median is shown as a black bar. Simulated data from*  
 1017 *Encoding-Error Model (A)Circular mean of angle error for the 7 triangle types from experiment 1. (B)Mean distance*  
 1018 *error for the unguided walk from experiment 1. (C) Angle error and Distance error of all trials from experiment 1*  
 1019 *showing no correlation. (D)Circular mean of angle error for the 5 triangle sizes. (E) Mean distance error for the*  
 1020 *unguided walk from experiment 2. (F) Angle error and Distance error of all trials from experiment 2 showing no*  
 1021 *correlation.*

1022



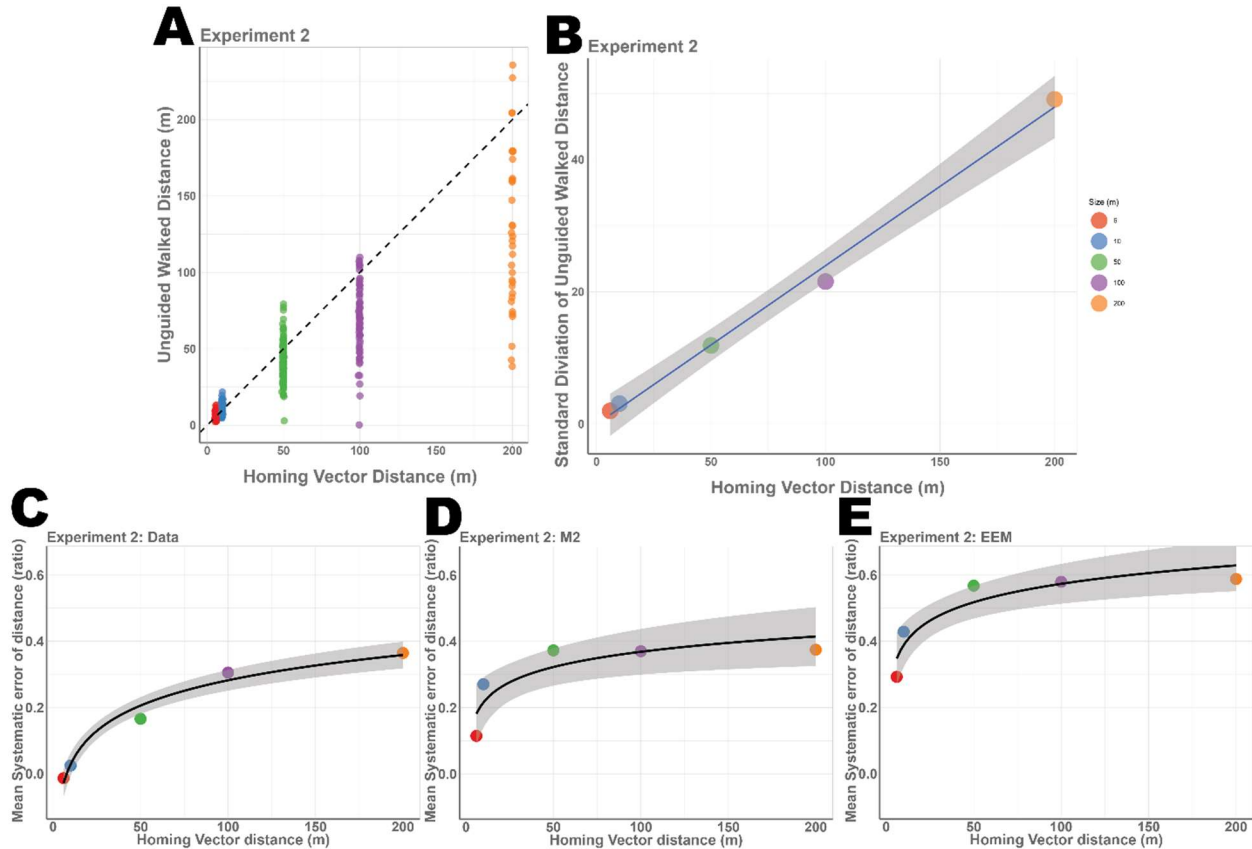

1023

1024 *Figure 7: Results from Experiment 2, (A) showing the distribution of the Unguided walked distances for each triangle*  
 1025 *size with  $y=x$  plotted at the dotted line. (B) Standard deviation of the Unguided walked distances show a linear*  
 1026 *increase ( $t(4)=23.6, p<0.0001$ ) (C) showing mean systematic errors of distance (1- distance error) increases*  
 1027 *logarithmically ( $t(4)=11.65, p<0.001$ ). (D) showing mean systematic errors of distance of the simulated data from*  
 1028 *model 2 increasing logarithmically ( $t(4)=3.187, p<0.05$ ). (E) showing mean systematic errors of distance of the*  
 1029 *simulated data from Encoding-Error Model increasing logarithmically ( $t(4)=4.407, p<0.022$ ).*

1030

1031

1032

1033

1034

1035

# Supplementary Figures

1036 **Supplementary Table 1**

**Experiment 1**

| <BC | <AB | <CA | Side A (m) | Side B (m) | Side C (m) | Perimeter (m) | Type            |
|-----|-----|-----|------------|------------|------------|---------------|-----------------|
| 60  | 100 | 20  | 8.793852   | 3.472964   | 10         | 22.267        | scalene         |
| 30  | 120 | 30  | 5.773503   | 5.773503   | 10         | 21.547        | isosceles       |
| 45  | 105 | 30  | 7.320508   | 5.176381   | 10         | 22.497        | scalene         |
| 60  | 90  | 30  | 8.660254   | 5          | 10         | 23.660        | right           |
| 60  | 75  | 45  | 8.965755   | 7.320508   | 10         | 26.286        | scalene         |
| 45  | 90  | 45  | 7.071068   | 7.071068   | 10         | 24.142        | isosceles-right |
| 60  | 60  | 60  | 10         | 10         | 10         | 30.000        | equilateral     |

1037 *Supplementary Table 1A: Showing the configuration of each triangle using in experiment 1.*

**Experiment 2**

| <BC | <AB | <CA | Side A (m) | Side B (m) | Side C (m) | Perimeter (m) | Type    |
|-----|-----|-----|------------|------------|------------|---------------|---------|
| 40  | 80  | 60  | 4.042      | 5.299      | 6          | 15.193        | scalene |
| 40  | 80  | 60  | 6.736      | 8.832      | 10         | 25.321        | scalene |
| 40  | 80  | 60  | 33.682     | 44.163     | 50         | 126.604       | scalene |
| 40  | 80  | 60  | 67.365     | 88.327     | 100        | 253.209       | scalene |
| 40  | 80  | 60  | 134.73     | 176.653    | 200        | 506.418       | scalene |

1038 *Supplementary Table 1B: Showing the configuration of each triangle using in experiment 2.*

1039

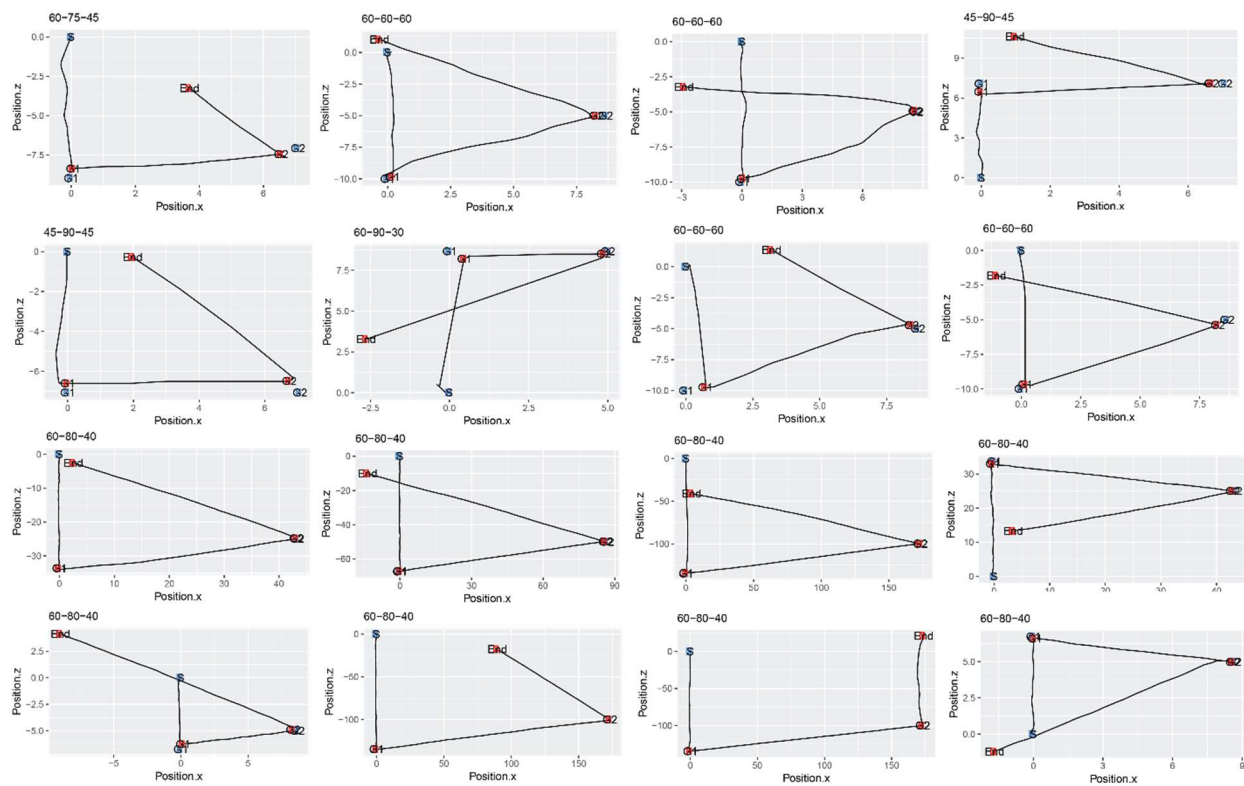

1040

1041 *Supplementary Figure 1: Raw trials from experiment 1 (top 8) and experiment 2 (bottom 8).*

**A** Experiment 1 (Vision vs Guided legs)

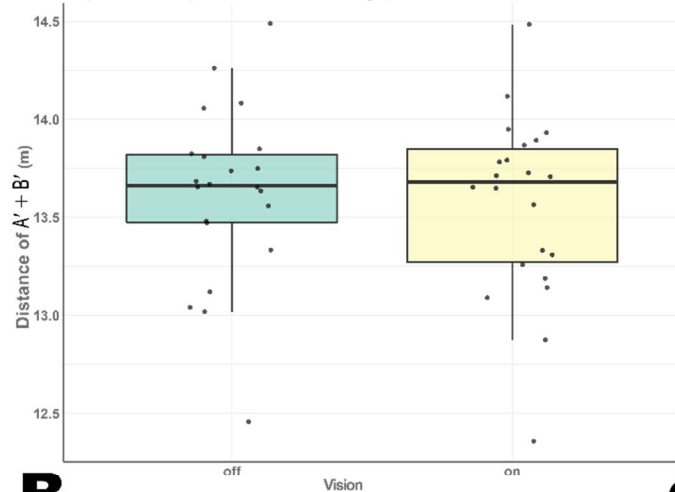

**B** Experiment 1 (Vision)

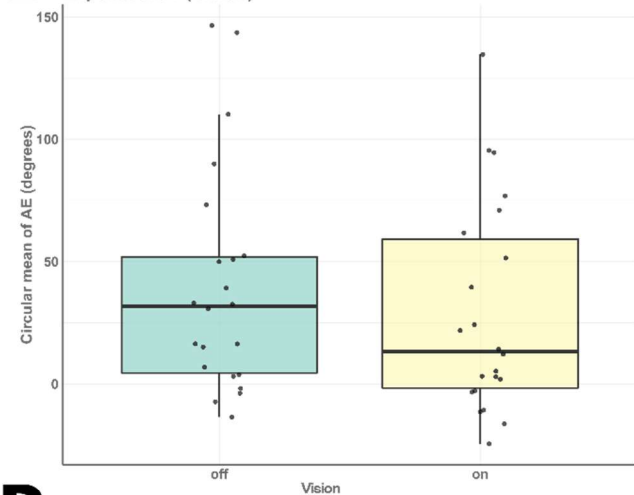

**C** Experiment 1 (Vision)

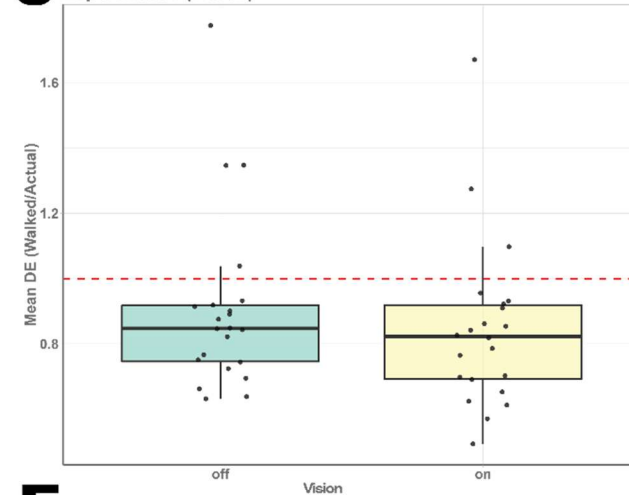

**D** Experiment 1 (Type and Vision)

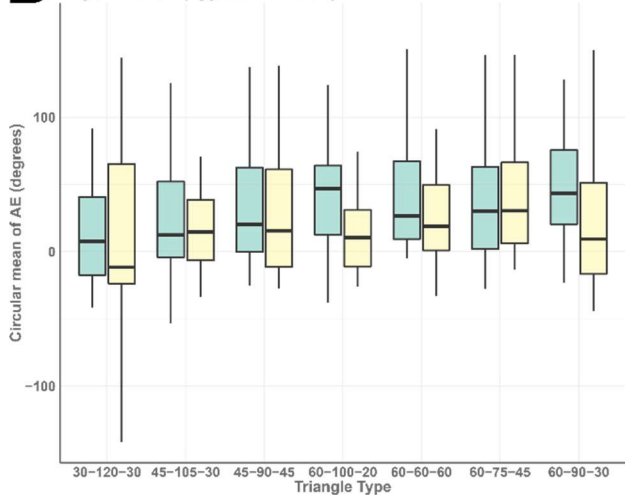

**E** Experiment 1 (Type and Vision)

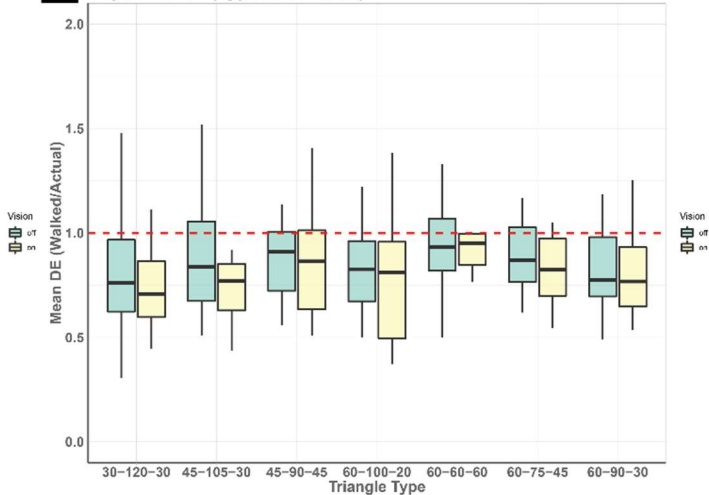

1043 *Supplementary Figure 2: (A) Combined distance walked during guided legs during vision on and vision off trial,*  
1044 *showing no differences ( $t(21)=1.09$ ,  $p=0.288$ , Cohen's  $d=0.336$  and  $BF_{01}>3$ ) (B) Angle error from experiment 1,*  
1045 *showing a small but significant difference between vision on and off condition ( $t(21)=2.46$ ,  $p<0.022$ , Cohen's  $d=0.248$*   
1046 *and  $BF_{10}=2.54$ ) (C) Distance error from experiment 1, showing a significant difference between vision on and off*  
1047 *condition ( $t(21)=2.71$ ,  $p<0.013$ , Cohen's  $d=0.232$  and  $BF_{10}=3.94$ ). (D) Angle error from experiment 1, ANOVA*  
1048 *significant for triangle type  $F(6,21)=2.9$ ,  $p<0.01$ ,  $\eta^2=0.058$   $BF_{10}=1.72$ . and Vision  $F(1, 21)=4.9$ ,  $p<0.026$ ,  $\eta^2=0.016$*   
1049  *$BF_{10}=1.16$ , but not for the interaction between Type and Vision  $F(6, 21)=1.454$ ,  $p=0.194$ ,  $\eta^2=0.029$   $BF_{10}=0.432$ . (E)*  
1050 *Distance error from experiment 1, ANOVA significant for triangle type  $F(6, 21)=5.7$ ,  $p<0.1.33e-5$ ,  $\eta^2=0.109$   $BF_{10}>10$*   
1051 *and r Vision  $F(1, 21)=8.2$ ,  $p<0.004$ ,  $\eta^2=0.026$   $BF_{10}>4$ , but not for the interaction between Type and Vision  $F(6,$*   
1052 *21)=0.199,  $p=0.976$ ,  $\eta^2=0.004$   $BF_{10}>10$ .*

1053

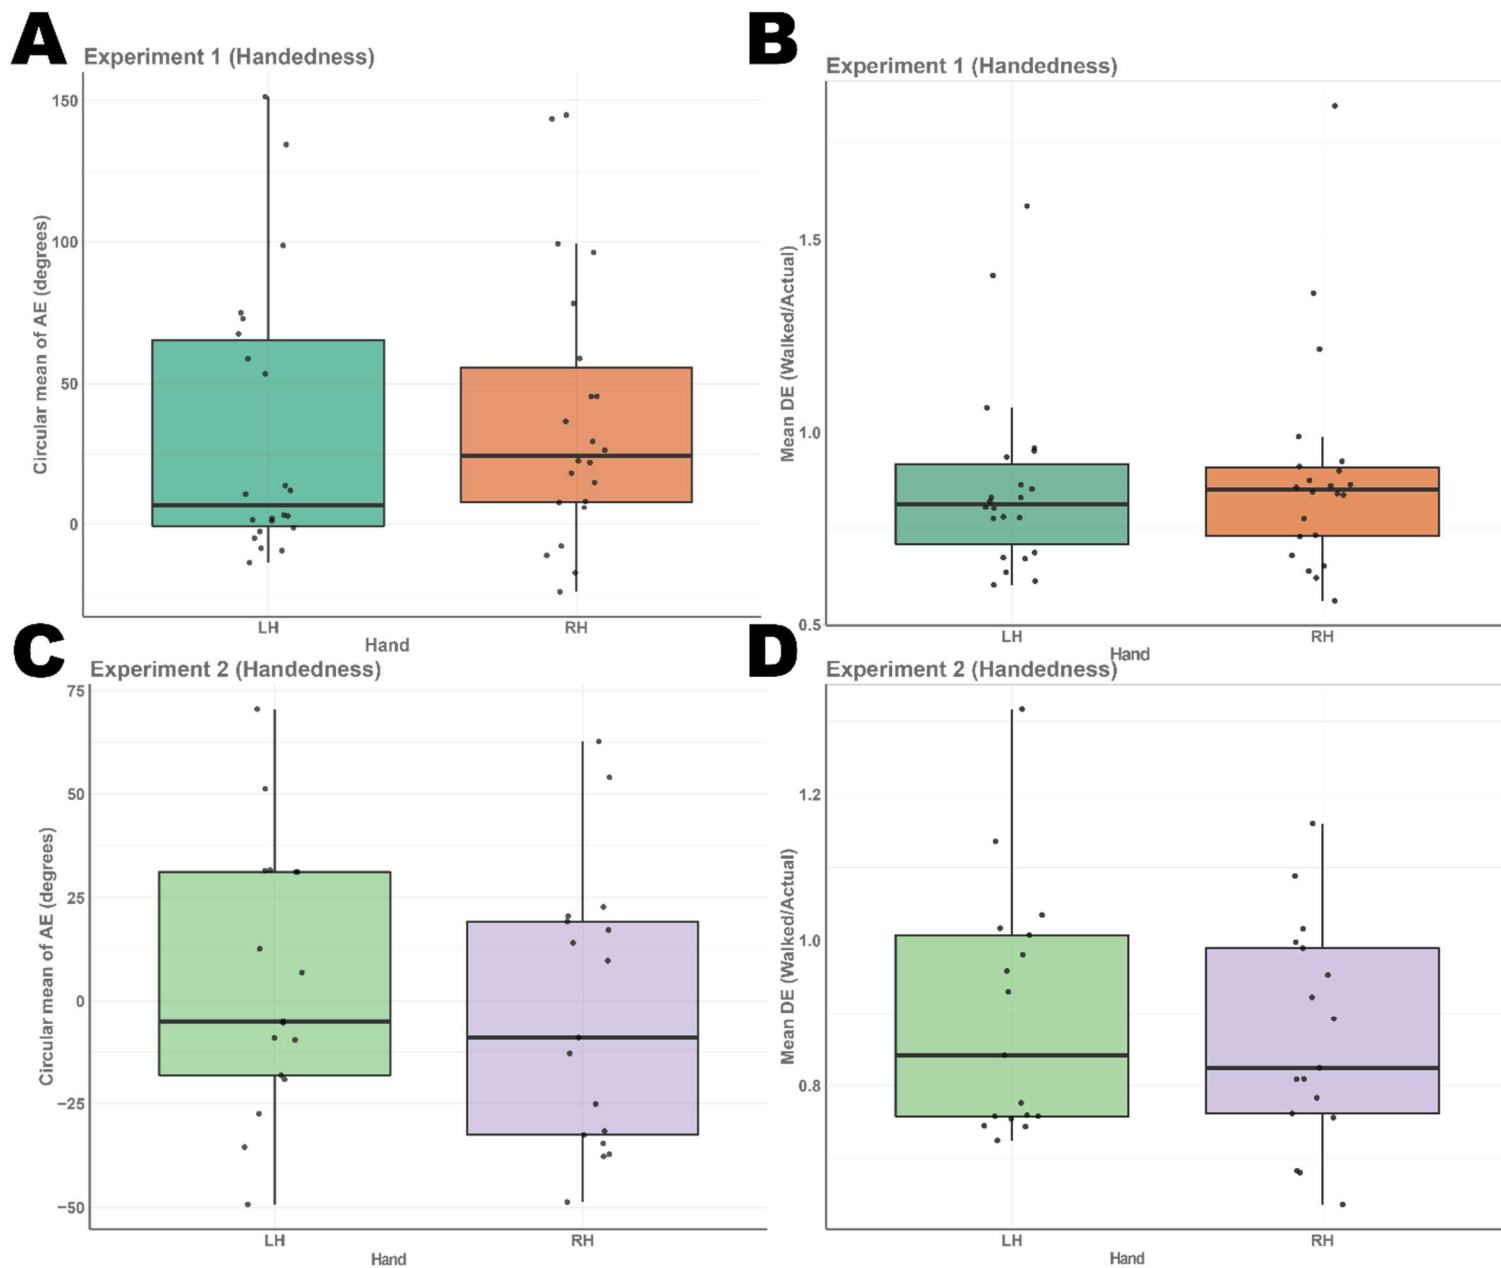

1054

1055 *Supplementary Figure 3: (A) Angle error from experiment 1 which showed no difference between left and right-*  
1056 *handed triangles ( $t(21)=0.7$ ,  $p=0.485$ , Cohen's  $d=0.118$  and  $BF_{01}>3$ ). (B) Distance error from experiment 1, which*  
1057 *showed no difference between left and right-handed triangle ( $t(21)=1.136$ ,  $p=0.268$ , Cohen's  $d=0.103$  and*  
1058  *$BF_{01}=2.53$ ). (C) Angle error from experiment 2, again showing no difference between left and right-handed triangle*  
1059 *( $t(16)=1.51$ ,  $p=0.151$ , Cohen's  $d=0.245$  and  $BF_{01}=1.55$ ). (D) Distance error from experiment 2, which showed no*  
1060 *difference between left and right-handed triangle ( $t(16)=0.724$ ,  $p=0.4797$ , Cohen's  $d=0.176$  and  $BF_{01}=3.188$ ).*

1061

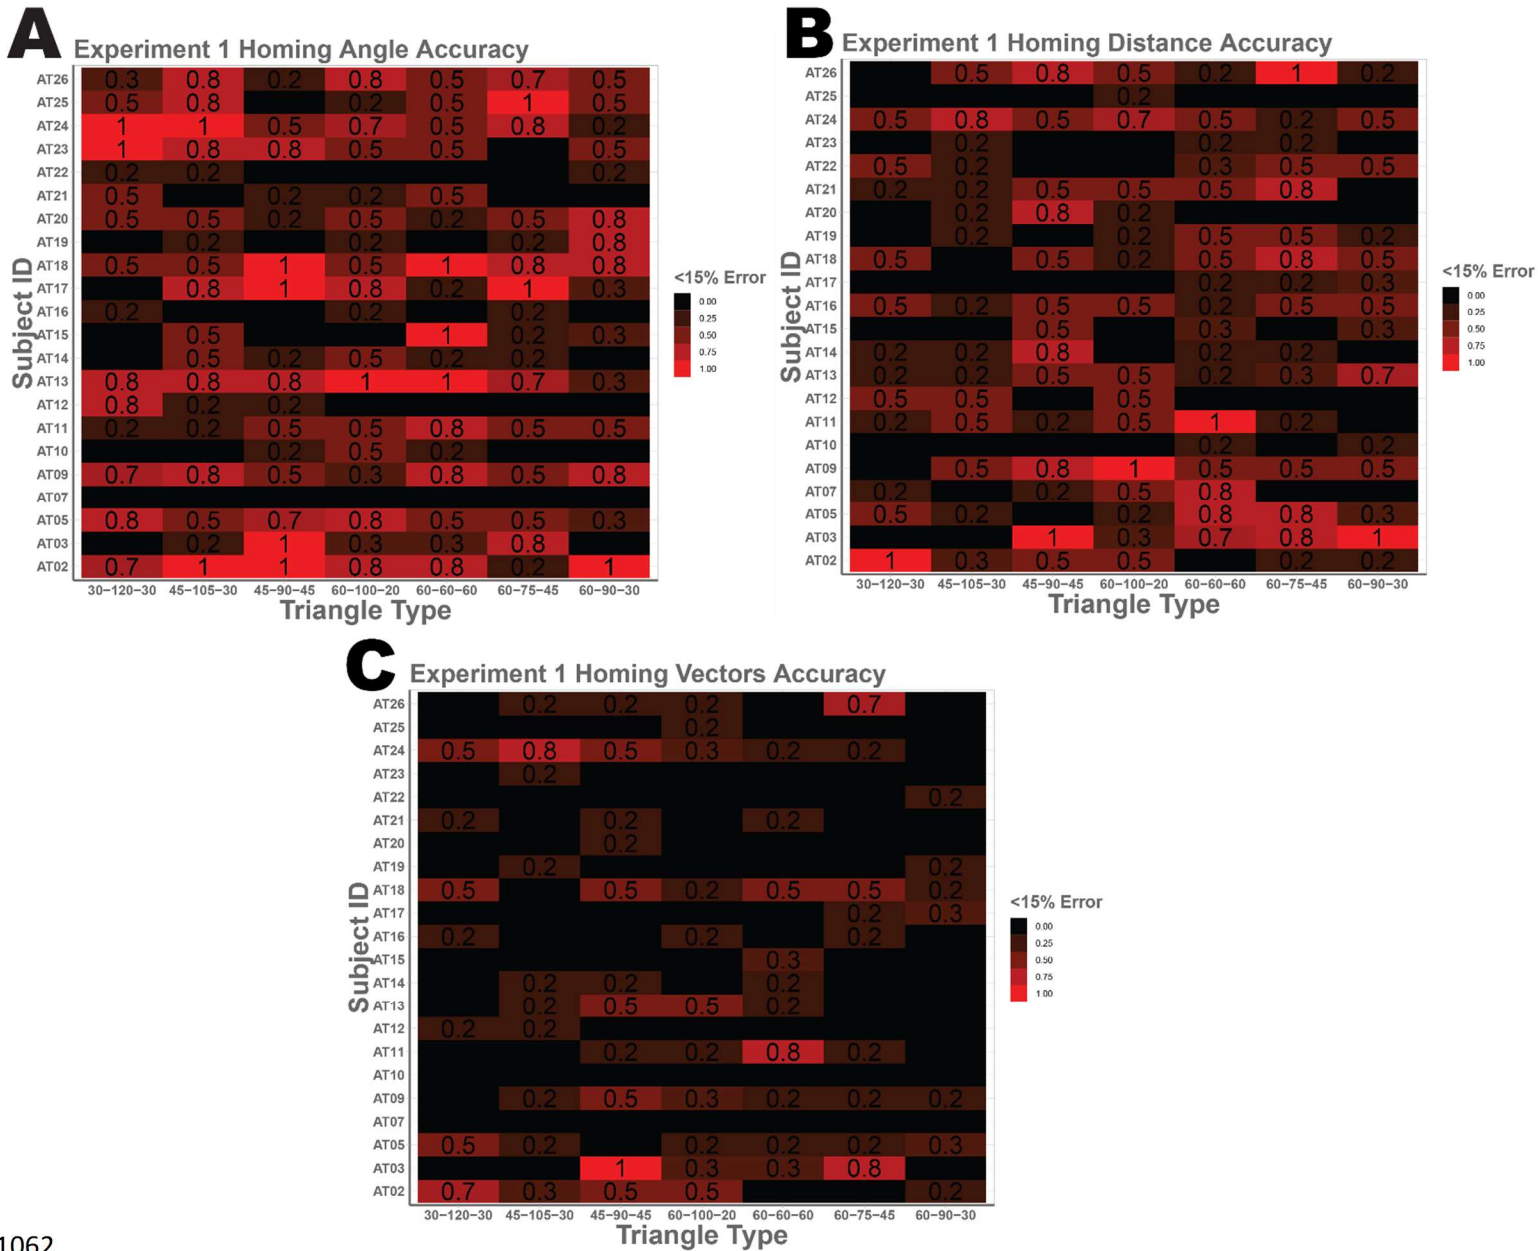

1062

1063 *Supplementary Figure 4: Raster plot (A) showing the percentage of responses with less than 15% angle error (ranging*  
 1064 *from -27° to 27°) for triangle type (x-axis) and participants (y-axis). Participants are 281.39% more likely to have <15%*  
 1065 *angle error in their unguided leg than <15% total error (angle and distance). (B) percentage of responses with less than*  
 1066 *15% distance error (8.5m to 11.5m). Participants are 208.14% more likely to have <15% distance error in there*  
 1067 *unguided leg than <15% total error (angle and distance). (C) percentage of responses with less than 15% angle error*  
 1068 *(ranging from -27° to 27°) and 10% distance error (8.5m to 11.5m). In (C) we can see that all of participant AT03's*  
 1069 *responses for triangle 45-90-45 are less than 15% error for both angle and distance error. And 80% for equilateral*  
 1070 *triangle (60-60-60) for participant AT11.*



1071

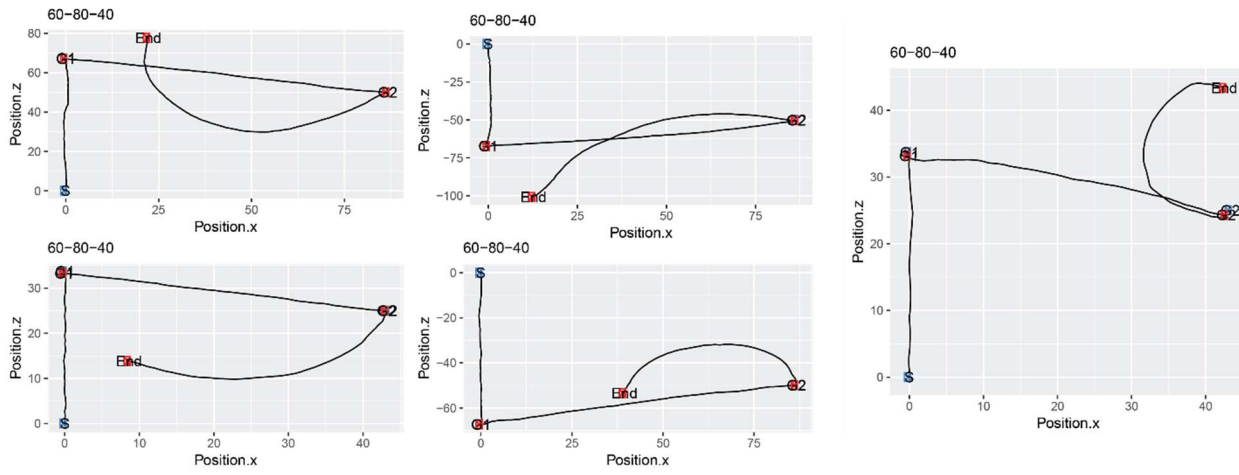

1072

1073

*Supplementary Figure 5: Raw trials that were removed due to circular pathing.*

1074

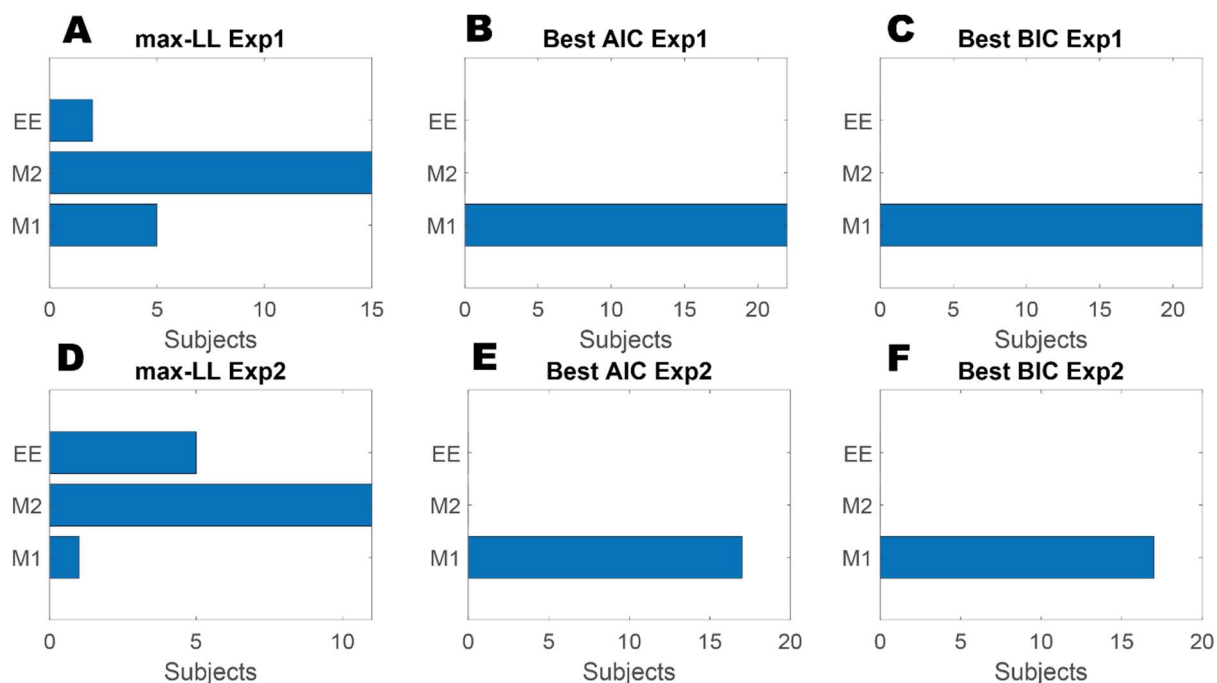

1075  
1076 *Supplementary Figure 6: Comparing model fitting of the individual participant's data. A) Shows best model fit (highest*  
1077 *loglikelihood values) for each subject in experiment 1. B&C) Lowest AIC and BIC values across the 3 models for each*  
1078 *subject in experiment 2. D) Shows best model fit (highest loglikelihood values) for each subject in experiment 2. E&F)*  
1079 *Lowest AIC and BIC values across the 3 models for each subject in experiment 2*

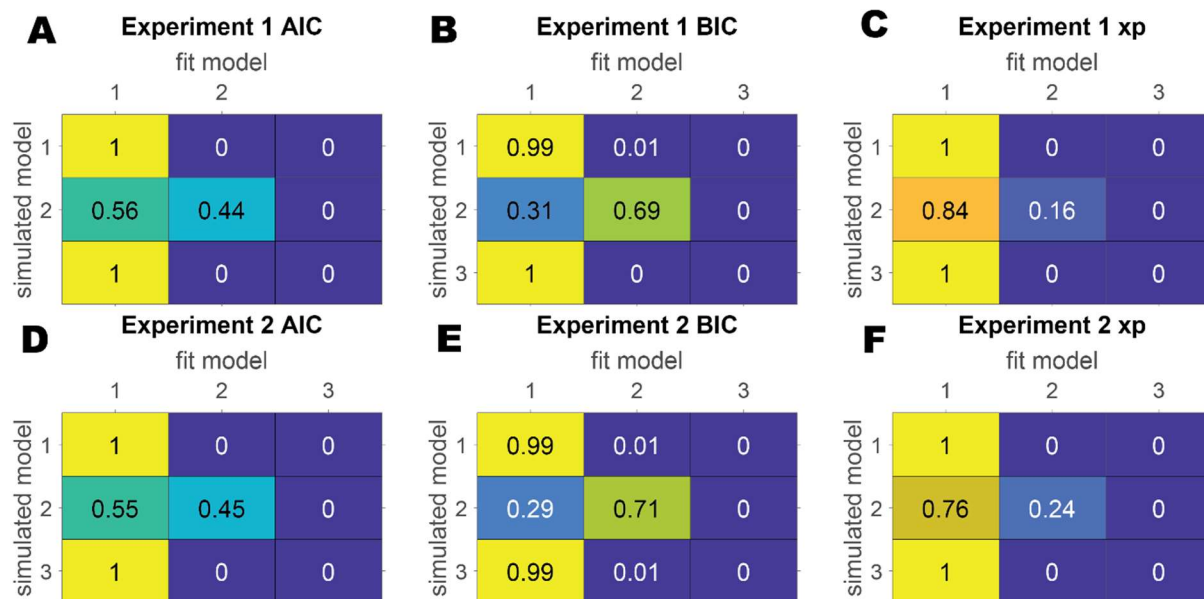

1080

1081 *Supplementary Figure 7: Model recovery confusion matrices where 1 in column and row represents Model 1, 2*  
 1082 *represents Model 2 and 3 represents Encoding-Error Model. Probability ranges from 0 to 1. (A & B) Show best AIC*  
 1083 *and BIC for Experiment 1 respectively. The higher value in the diagonal shows better model recovery from this*  
 1084 *experiment. We see that the Encoding-Error does not fit its own simulated data well. (C)The Exceedance Probability*  
 1085 *for Experiment 1. (D & E) Show best AIC and BIC for Experiment 2 respectively. Again, we see Encoding-Error does*  
 1086 *not fit its simulated data well. (C)The Exceedance Probability for Experiment 2.*

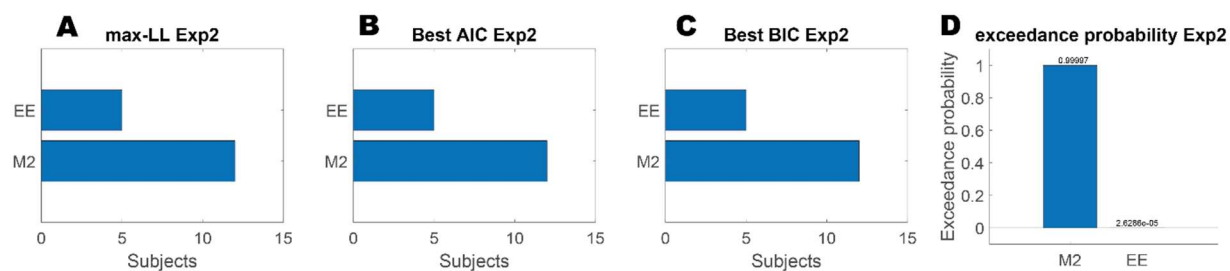

1087  
1088 *Supplementary Figure 8: Comparing model fitting of the individual participant's data. A) Shows best model fit (highest*  
1089 *loglikelihood values) for each subject in experiment 2. B&C) Lowest AIC and BIC values across the 3 models for each*  
1090 *subject in experiment 2. D) Shows the exceedance probability of each model for experiment 2.*  
1091

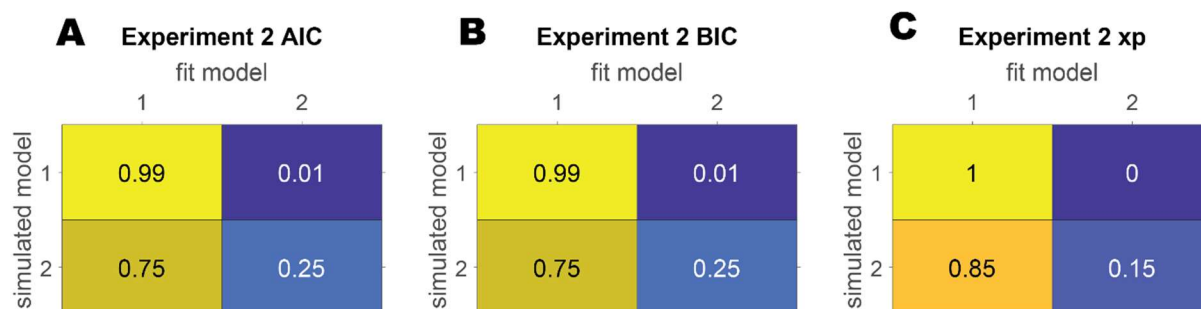

1092

1093 *Supplementary Figure 9: Model recovery confusion matrices where 1 in column and row represents Model 2 and 2*  
1094 *represents Encoding-Error Model. Probability ranges from 0 to 1. (A & B) Show best AIC and BIC for Experiment 2*  
1095 *respectively. We see Encoding-Error does not fit its own simulated data well. (C) The Exceedance Probability for*  
1096 *Experiment 2.*

1097

1098
